# Supplementary material for: Vorinostat Improves Myotonic Dystrophy Type 1 Splicing Abnormalities in DM1 Muscle Cell Lines and Skeletal Muscle from a DM1 Mouse Model
Source: MDPI journal article supplement (doi:10.3390/ijms24043794), 2023-02-14
Supplement: s1 [file s1]

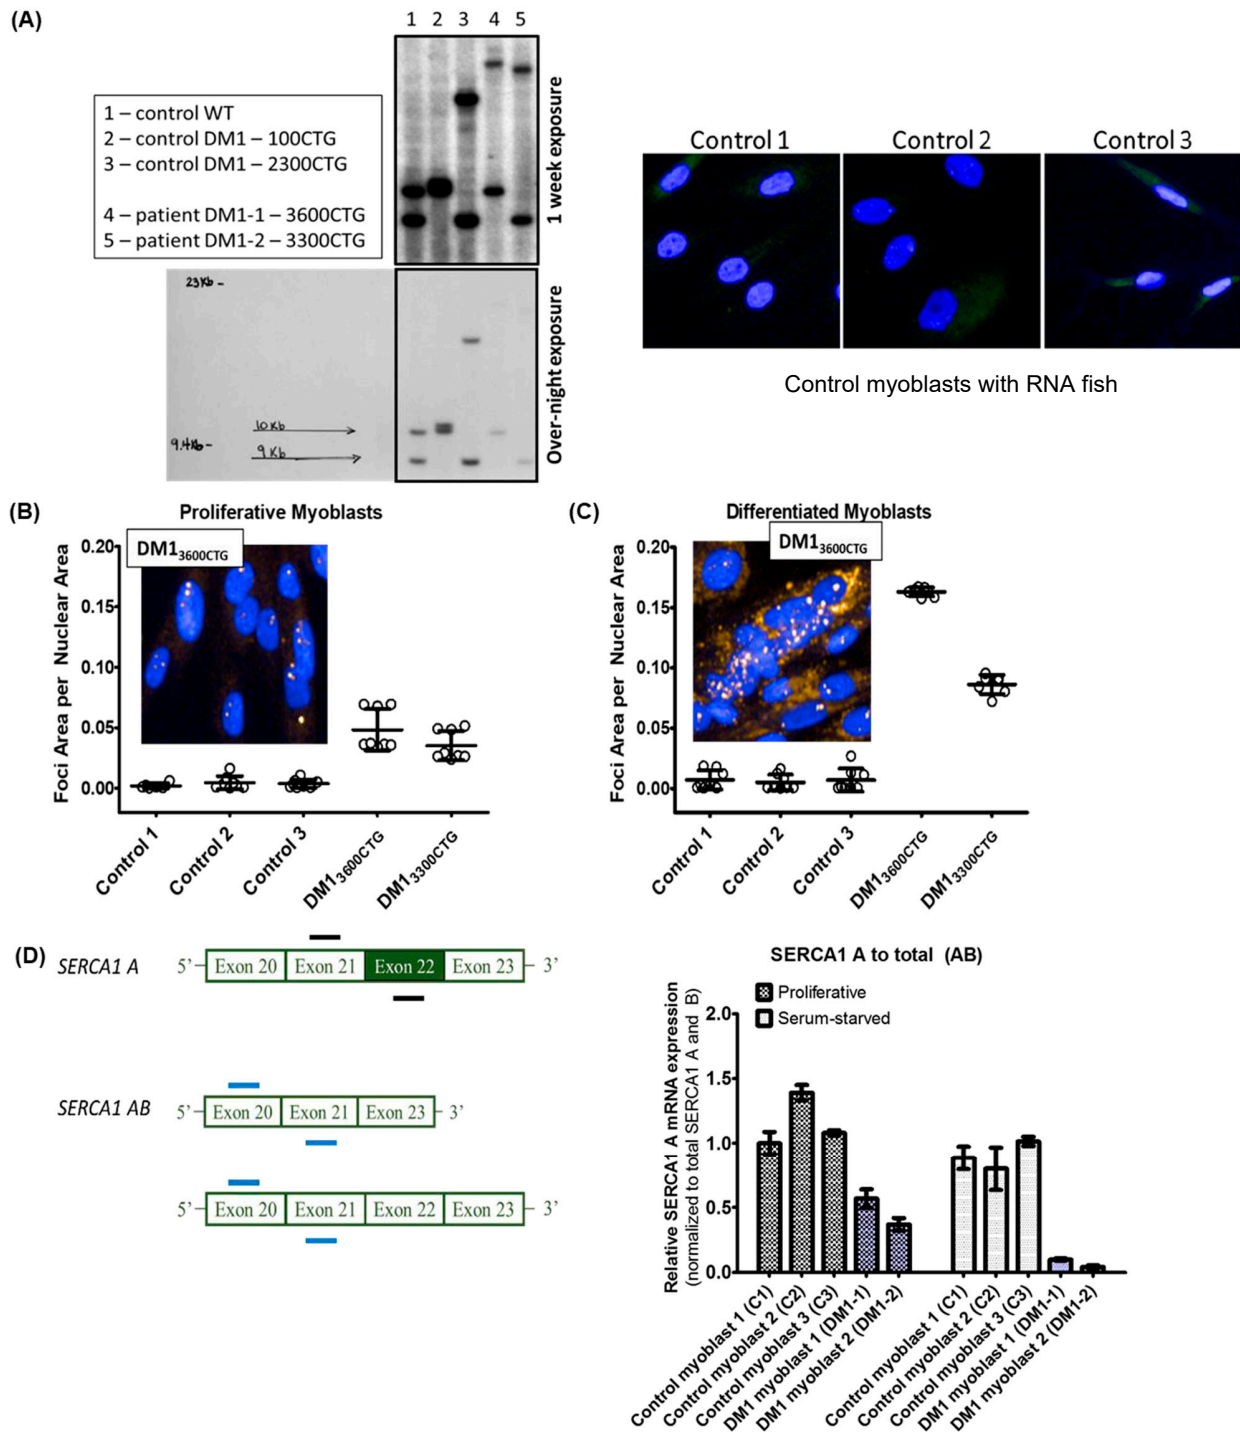

**Fig. S1.** DM1 myoblasts contained 3000+ CTG repeats, had intranuclear CUG-foci and had SERCA1 spliceopathy. (A) Southern blot analysis of genomic DNA extracted from two immortalized DM1 myoblasts (lane 4 and 5). Lane 1 contains DNA from an individual known to be void of the DM1 genotype (negative control); lanes 2 and 3 contain

DNA from individuals known to have DM1 with pre-established repeat sizes (positive control). Lanes 1-3 serve as representative controls used for diagnostic purposes at the CHEO genetic clinic. (B-C) RNA FISH for the analysis of intranuclear CUG-foci. Cells were grown and/or differentiated for 7 days in a 384-well plate (n=7) and fixed with 4% PFA. DNA was stained with Hoechst and CUG RNA foci were probed by Alexa555-(CAG)<sub>10</sub> oligonucleotide probe. Average foci area per nuclear area is presented from (B) proliferative myoblasts growing in Ham's F14 complete growth media containing 30% FBS or (C) differentiated myoblasts serum-starved in Ham's F14 growth media supplemented with 1% horse-serum. (D) RT-qPCR analysis of SERCA1 spliceopathy in proliferative and differentiated myoblasts. DM1-1 cells are DM1<sub>3600</sub>CTG and DM1-2 cells are DM1<sub>3300</sub>CTG.

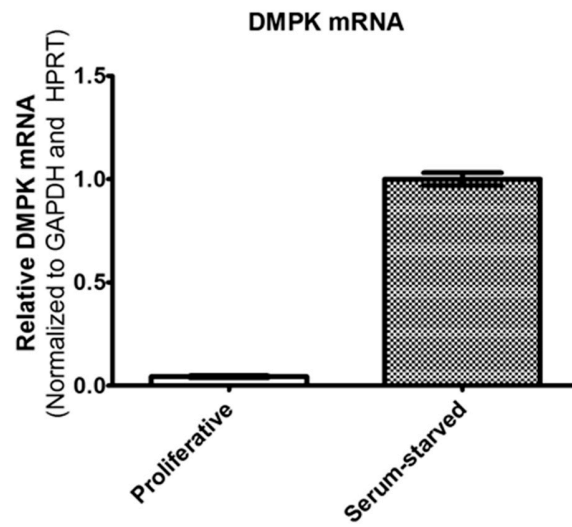

**Fig. S2.** DMPK mRNA expression is greater in serum-starved (differentiated) than proliferative DM1<sub>3600CTG</sub> immortalized myoblasts. Cells were grown in complete media (proliferative) or additionally serum-starved in differentiation media for 7, RNA was extracted and converted to cDNA, and DMPK mRNA was quantified using qPCR to compare expression between proliferative and serum-starved DM1<sub>3600CTG</sub> myoblast, normalized to GAPDH and HPRT.

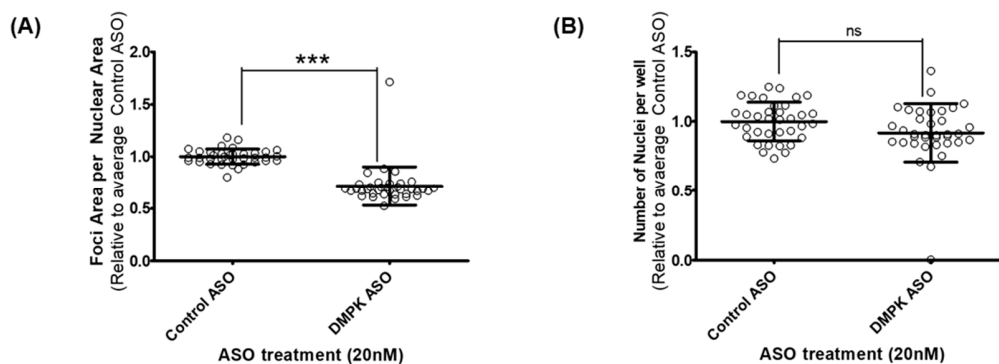

**Fig. S3.** DMPK ASO reduced foci by 30% in differentiated DM1<sub>3600CTG</sub> myoblasts. DM1<sub>3600CTG</sub> myoblasts were serum-starved in 384-well plates for 7 days and treated with 20 nM of control or DMPK ASO (ISIS486178) for 24 h (n=9, 6-wells per plate). Post-treatment, cells were fixed with 4% PFA, DNA was stained with Hoechst and CUG RNA foci were probed by Alexa555-(CAG)<sub>10</sub> fluorescent oligo. (A) Foci area per nuclear area and (B) number of nuclei per well (to assess ASO-associated toxicity) were quantified using Columbus Software. DMPK ASO was used as a positive control to measure assay quality and resulted in a Z' score of 0.84 using foci area per nuclear area in Supplementary Figure 3A, indicating an “excellent” separation between positive and negative controls.

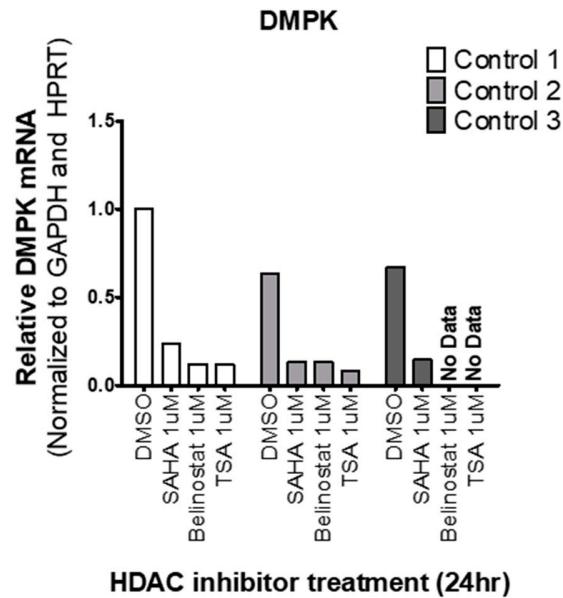

**Fig. S4.** Pan-HDAC inhibitors, vorinostat (SAHA), belinostat and TSA, all reduced DMPK mRNA levels in differentiated control myoblasts. Control myoblasts were serum-starved in 6-well plates for 7 days. Control cells were treated with DMSO alone 1 of vorinostat, belinostat and TSA. RNA was extracted (RNeasy micro kit, Qiagen) and reverse-transcribed to cDNA (iScript Advanced RT kit, BioRad). RT-qPCR was performed (iQ Sybr green supermix, BioRad) to assess mRNA levels of (A) *DMPK* and (B) *SERCA1* splicing. (n=1).

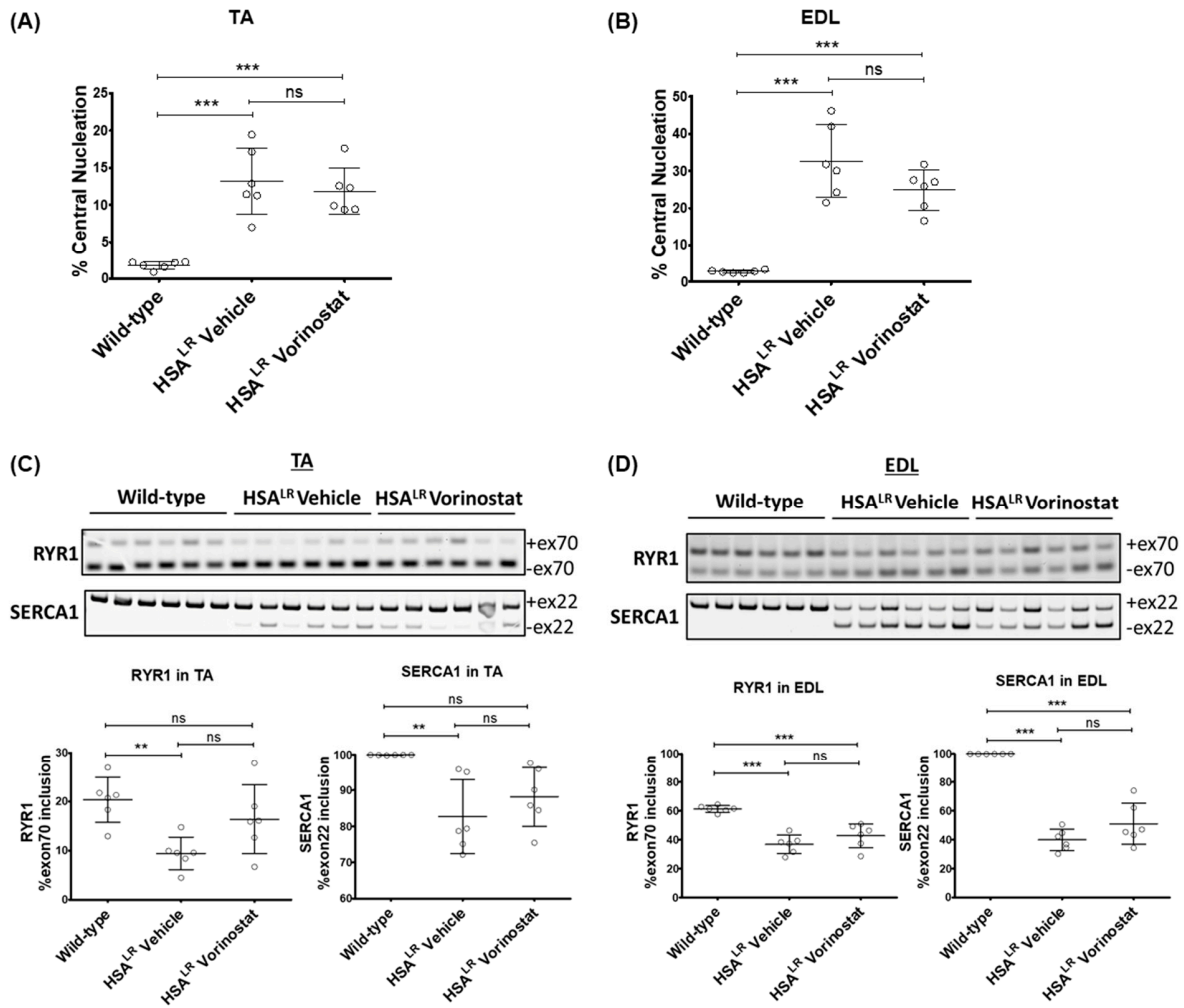

**Fig. S5.** Short-term treatment with low-dose (25 mg/kg) vorinostat showed a trend towards correcting disease pathology in HAS<sup>LR</sup> mice. Mice were injected (IP) daily with vehicle or 25 mg/kg vorinostat for 1 week. The mice were sacrificed by lethal injection and cervical dislocation. Skeletal muscle tissue from one hind leg was frozen in OCT for sectioning and imaging, and skeletal muscle tissue from the other hind leg was flash frozen in liquid nitrogen for RNA workup. (A-B) Analysis of central nucleation in TA and EDL muscle. Tissues flash frozen in OCT were sectioned at 10  $\mu$ m thickness and subjected to H&E staining. Brightfield images were taken at 20x using EVOS cell imaging system and whole sections were manually counted for central nucleation. (C-D) Analysis of DM1 related spliceopathy in TA and EDL muscle. Flash frozen tissue was ground to a powder and a portion used for Trizol RNA extraction using the Purelink RNA mini kit (Invitrogen) and reverse transcribed to cDNA (iScript Advanced RT kit, BioRad). RT-sqPCR products using cDNA from (C) TA and (D) EDL were resolved on 7% acrylamide gel, stained with Gel Red and imaged using the ChemiDoc (BioRad). Quantification of transcript ratios was done using ImageLab (BioRad). (n=6, two-way ANOVA; error bars represent SD). \* $p < 0.05$ , \*\* $p < 0.01$ , \*\*\* $p < 0.001$ ).

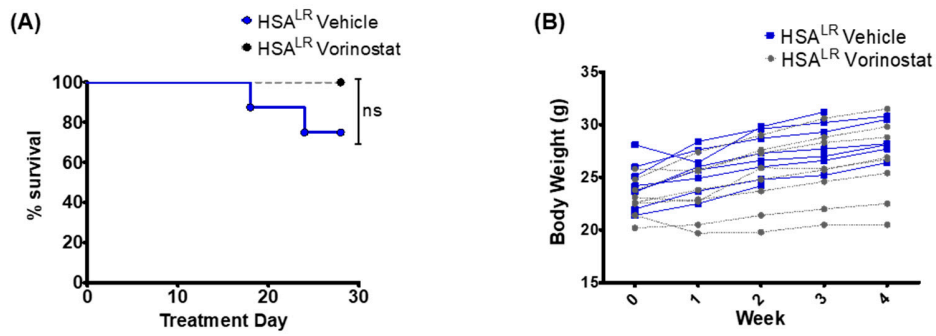

**Fig. S6.** Vorinostat is not toxic to DM1 HSA<sup>LR</sup> mouse model. Mice at approximately 4 weeks of age were injected (IP) daily with vehicle or 50 mg/kg vorinostat for 4 weeks. The mice were sacrifice by lethal injection and cervical dislocation. Skeletal muscle tissue from one hind leg was frozen in OCT for sectioning and imaging, and skeletal muscle tissue from the other hind leg was flash frozen in liquid nitrogen for RNA workup. (A) Survival plot and (B) body weight of the mice was used to assess toxicity of the drug.

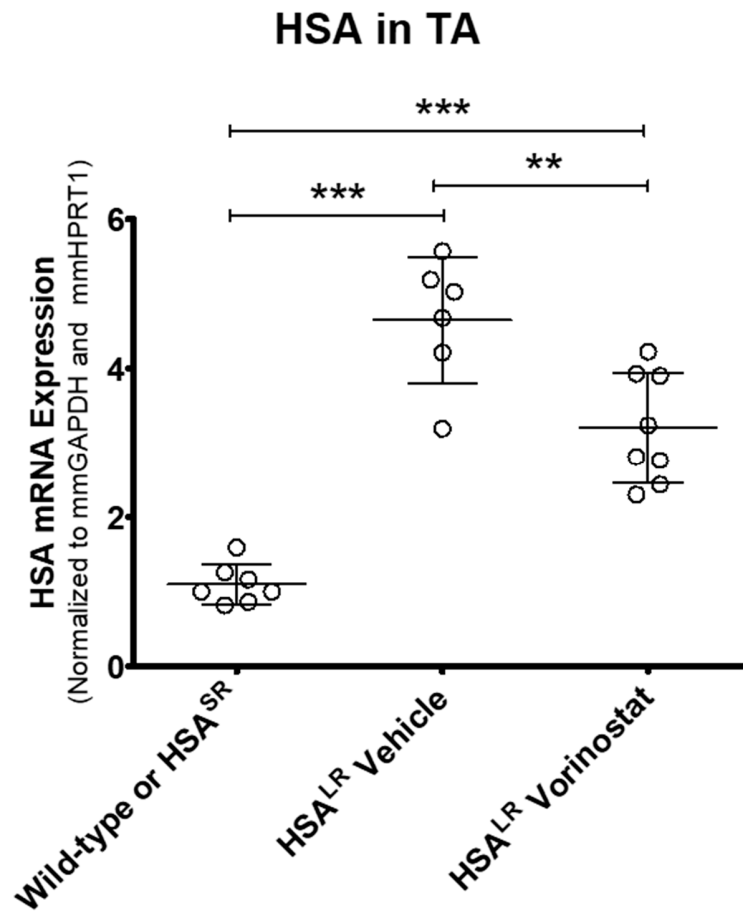

**Fig. S7.** Vorinostat reduced HSA mRNA levels in the TA muscle of DM1 HSALR mouse model. Mice at approximately 4 weeks of age were injected (IP) daily with vehicle or 50 mg/kg vorinostat for 4 weeks. The mice were sacrifice by lethal injection and cervical dislocation. Skeletal muscle tissue from one hind leg was frozen in OCT for sectioning and imaging, and skeletal muscle tissue from the other hind leg was flash frozen in liquid nitrogen for RNA workup. Flash frozen tissue was ground to a powder and a portion used for Trizol RNA extraction using the Purelink RNA mini kit (Invitrogen) and reverse transcribed to cDNA (iScript Advanced RT kit, BioRad). RT-qPCR was performed to quantity HSA mRNA levels in the TA muscle, relative to mouse GAPDH and HPRT (mmGAPDH and mmHPRT, respectively). (n ranges from 6 to 8, two-way ANOVA; error bars represent SD). \* $p < 0.05$ , \*\* $p < 0.01$ , \*\*\* $p < 0.001$ .



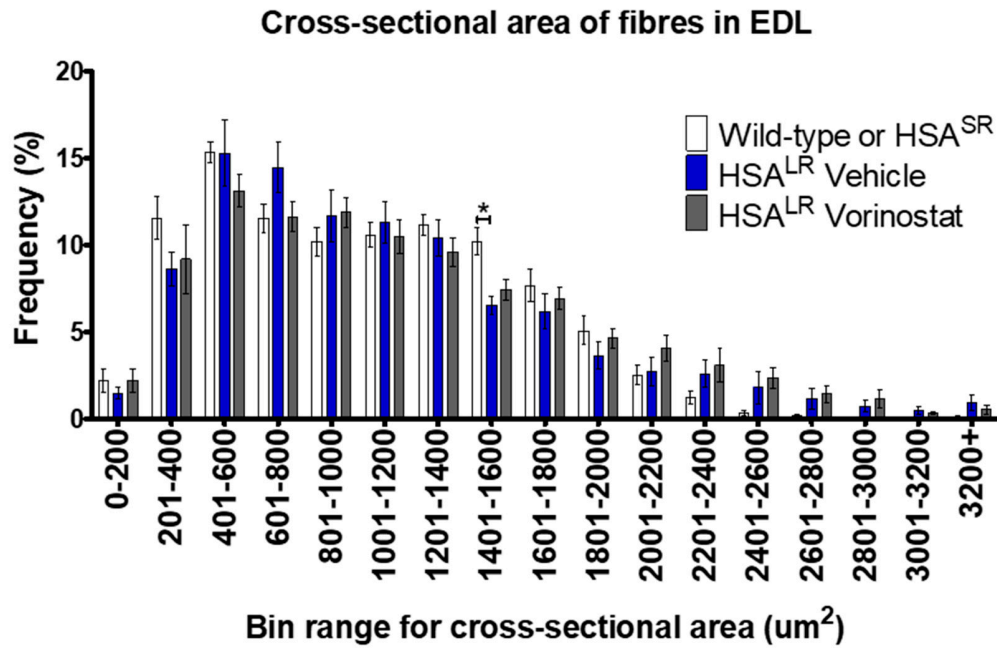

**Fig. S8.** Vorinostat does not correct trends of hypertrophy in EDL muscle of DM1 HSALR mouse model. Mice at approximately 4 weeks of age were injected (IP) daily with vehicle or 50 mg/kg vorinostat for 4 weeks. The mice were sacrificed by lethal injection and cervical dislocation. Skeletal muscle tissue from one hind leg was frozen in OCT for sectioning and imaging. Laminin-stained fibre images were used to quantify cross-sectional area (CSA); a combination of automated tracing using the open-CSAM plugin and manual tracing in Image J was used. In order to represent fibre-size distribution, the CSAs were binned every  $200 \mu\text{m}^2$  and % frequency of each bin was calculated relative to total number of laminin-positive fibres. (n 10 ranges from 6 to 8, two-way ANOVA; error bars represent SD). \* $p < 0.05$ , \*\* $p < 0.01$ , \*\*\* $p < 0.001$ .

**Table S1.** Summary of FDA small-molecule screen in differentiated DM1<sub>3600CTG</sub> myoblasts. DM1<sub>3600CTG</sub> myoblasts were serum-starved in 384-well plates for 7 days and treated with 2  $\mu$ M of drugs for 24 h. Post-treatment, cells were fixed with 4% PFA, DNA was stained with Hoechst and CUG RNA foci were probed by Alexa555-(CAG)<sub>10</sub>. Foci area per nuclear area and number of nuclei per well were quantified using Columbus and normalized to DMSO control data per plate. Data is presented as the average fold-change relative to DMSO treatment (n=3). SCREEN-WELL® FDA approved drug library V2 catalog number BML-2843 (Enzo Life Sciences, Farmingdale, NY, USA). The rankings in Table S1 are based on the reduction in foci per nuclear area (green column).

| Plate ID  | Drug # | Drug Name                        | Well Name | Fold change based on DMSO mean (foci) |       | Fold change based on DMSO mean (nuclei) |       |
|-----------|--------|----------------------------------|-----------|---------------------------------------|-------|-----------------------------------------|-------|
|           |        |                                  |           | Average                               | Stdev | Average                                 | Stdev |
| cFDA800_1 | 141    | Auranofin                        | G4        | 0.323                                 | 0.416 | 0.004                                   | 0.003 |
| cFDA800_1 | 183    | Vorinostat                       | K7        | 0.481                                 | 0.04  | 0.806                                   | 0.08  |
| cFDA800_2 | 409    | Arsenic Trioxide                 | C14       | 0.492                                 | 0.069 | 0.318                                   | 0.039 |
| cFDA800_1 | 189    | Gemcitabine·HCl                  | K19       | 0.618                                 | 0.038 | 0.87                                    | 0.019 |
| cFDA800_1 | 170    | Bortezomib                       | I21       | 0.673                                 | 0.023 | 0.729                                   | 0.045 |
| cFDA800_2 | 437    | Busulfan                         | F10       | 0.691                                 | 0.037 | 0.478                                   | 0.089 |
| cFDA800_1 | 194    | Clofarabine                      | L9        | 0.726                                 | 0.012 | 0.933                                   | 0.018 |
| cFDA800_1 | 256    | Disulfiram                       | J14       | 0.73                                  | 0.099 | 0.552                                   | 0.168 |
| cFDA800_2 | 368    | Misoprostol                      | E17       | 0.749                                 | 0.053 | 0.986                                   | 0.03  |
| cFDA800_1 | 156    | Mitomycin C                      | H14       | 0.755                                 | 0.015 | 0.922                                   | 0.096 |
| cFDA800_1 | 248    | Cytarabine                       | I18       | 0.763                                 | 0.041 | 0.911                                   | 0.032 |
| cFDA800_1 | 305    | Mitoxantrone·HCl                 | O12       | 0.764                                 | 0.218 | 0.445                                   | 0.019 |
| cFDA800_3 | 703    | Podofilox                        | H21       | 0.766                                 | 0.047 | 0.96                                    | 0.121 |
| cFDA800_2 | 410    | Artemether                       | C16       | 0.774                                 | 0.038 | 0.99                                    | 0.024 |
| cFDA800_2 | 423    | Benazepril·HCl                   | D22       | 0.779                                 | 0.037 | 1.101                                   | 0.021 |
| cFDA800_1 | 244    | Clobetasol Propionate            | I10       | 0.788                                 | 0.033 | 1.07                                    | 0.035 |
| cFDA800_3 | 322    | Penicillin V Potassium           | M5        | 0.8                                   | 0.42  | 1.007                                   | 0.048 |
| cFDA800_2 | 370    | Cilastatin·Na                    | E21       | 0.803                                 | 0.045 | 1.004                                   | 0.033 |
| cFDA800_2 | 453    | Cefprozil                        | G22       | 0.806                                 | 0.045 | 0.928                                   | 0.091 |
| cFDA800_2 | 445    | Cefadroxil                       | G6        | 0.81                                  | 0.016 | 0.921                                   | 0.058 |
| cFDA800_2 | 492    | Dantrolene·Na                    | K19       | 0.812                                 | 0.018 | 1.054                                   | 0.057 |
| cFDA800_2 | 595    | Ketorolac Tromethamine           | N6        | 0.816                                 | 0.05  | 0.961                                   | 0.02  |
| cFDA800_3 | 789    | Ursodiol                         | I13       | 0.816                                 | 0.204 | 1.047                                   | 0.107 |
| cFDA800_2 | 422    | Beclomethasone Dipropionate      | D20       | 0.827                                 | 0.077 | 0.965                                   | 0.112 |
| cFDA800_3 | 657    | Mometasone Furoate               | D9        | 0.827                                 | 0.095 | 0.982                                   | 0.104 |
| cFDA800_2 | 525    | Droperidol                       | O5        | 0.83                                  | 0.08  | 1.013                                   | 0.023 |
| cFDA800_2 | 383    | Cyproheptadine·HCl Sesquihydrate | G7        | 0.833                                 | 0.034 | 1.121                                   | 0.122 |
| cFDA800_3 | 779    | Tretinoin                        | H14       | 0.835                                 | 0.055 | 1.114                                   | 0.249 |
| cFDA800_3 | 311    | Norfloxacin                      | L4        | 0.843                                 | 0.189 | 1.138                                   | 0.192 |

|           |     |                                                |     |       |       |       |       |
|-----------|-----|------------------------------------------------|-----|-------|-------|-------|-------|
| cFDA800_3 | 780 | Triamcinolone Acetonide                        | H16 | 0.844 | 0.016 | 0.975 | 0.11  |
| cFDA800_1 | 107 | Dinoprostone                                   | C16 | 0.849 | 0.041 | 0.948 | 0.076 |
| cFDA800_1 | 209 | Vincristine Sulfate                            | M19 | 0.849 | 0.072 | 0.858 | 0.009 |
| cFDA800_3 | 81  | Nisoldipine                                    | K4  | 0.851 | 0.241 | 1.048 | 0.086 |
| cFDA800_1 | 135 | Ethacrynic Acid                                | F12 | 0.851 | 0.02  | 0.937 | 0.06  |
| cFDA800_1 | 133 | Dexamethasone                                  | F8  | 0.853 | 0.059 | 1.069 | 0.02  |
| cFDA800_1 | 120 | Gabapentin                                     | D22 | 0.856 | 0.223 | 0.97  | 0.054 |
| cFDA800_3 | 1   | Clindamycin·HCl                                | K3  | 0.858 | 0.231 | 1.063 | 0.188 |
| cFDA800_1 | 300 | Methylprednisolone                             | N22 | 0.864 | 0.038 | 1.024 | 0.084 |
| cFDA800_1 | 273 | Fluocinolone Acetonide                         | L8  | 0.865 | 0.042 | 0.991 | 0.05  |
| cFDA800_2 | 577 | Homatropine Methylbromide                      | L10 | 0.869 | 0.016 | 0.968 | 0.05  |
| cFDA800_2 | 381 | Capecitabine                                   | G3  | 0.877 | 0.048 | 1.079 | 0.117 |
| cFDA800_1 | 199 | Adapalene                                      | L19 | 0.88  | 0.035 | 0.868 | 0.036 |
| cFDA800_2 | 332 | Ramipril                                       | B5  | 0.88  | 0.041 | 1.189 | 0.046 |
| cFDA800_1 | 167 | Calcipotriene                                  | I15 | 0.882 | 0.026 | 1.02  | 0.099 |
| cFDA800_1 | 227 | Betamethasone                                  | O15 | 0.883 | 0.049 | 0.995 | 0.088 |
| cFDA800_2 | 341 | Sulfasalazine                                  | C3  | 0.884 | 0.04  | 0.978 | 0.065 |
| cFDA800_2 | 459 | Cephalexin Monohydrate                         | H14 | 0.885 | 0.061 | 0.891 | 0.049 |
| cFDA800_2 | 505 | Desoximetasone                                 | M5  | 0.89  | 0.051 | 1.014 | 0.019 |
| cFDA800_1 | 283 | Hydrocortisone Acetate                         | M8  | 0.895 | 0.067 | 1.051 | 0.099 |
| cFDA800_1 | 53  | (±) Isoproterenol·HCl                          | F7  | 0.896 | 0.029 | 0.852 | 0.016 |
| cFDA800_3 | 614 | Mafenide·HCl                                   | N4  | 0.899 | 0.336 | 1.119 | 0.137 |
| cFDA800_3 | 6   | Mycophenolic Acid                              | K13 | 0.901 | 0.069 | 1.054 | 0.218 |
| cFDA800_1 | 63  | Epinephrine (L-(-)-Epinephrine-(+)-Bitartrate) | G7  | 0.902 | 0.019 | 0.856 | 0.073 |
| cFDA800_1 | 32  | Salbutamol Hemisulfate                         | D5  | 0.903 | 0.016 | 0.86  | 0.03  |
| cFDA800_3 | 7   | Sirolimus (Rapamycin)                          | K15 | 0.904 | 0.091 | 1.134 | 0.227 |
| cFDA800_3 | 698 | Phenylephrine                                  | H11 | 0.907 | 0.082 | 0.632 | 0.51  |
| cFDA800_1 | 282 | Hydrocortisone                                 | M6  | 0.912 | 0.066 | 1.007 | 0.198 |
| cFDA800_2 | 378 | Miglustat (N-Butyldeoxynojirimycin·HCl)        | F17 | 0.916 | 0.096 | 0.881 | 0.057 |
| cFDA800_3 | 740 | Sitagliptin Phosphate                          | D16 | 0.916 | 0.058 | 1.089 | 0.13  |
| cFDA800_3 | 783 | Trientine Dihydrochloride                      | H22 | 0.917 | 0.061 | 1.101 | 0.179 |
| cFDA800_3 | 321 | Pentoxifylline                                 | M3  | 0.92  | 0.23  | 0.722 | 0.499 |
| cFDA800_1 | 97  | Bleomycin Sulfate                              | B16 | 0.921 | 0.06  | 0.873 | 0.076 |
| cFDA800_1 | 193 | Mycophenolate Mofetil                          | L7  | 0.921 | 0.021 | 0.917 | 0.055 |
| cFDA800_1 | 34  | Dobutamine·HCl                                 | D9  | 0.923 | 0.013 | 0.997 | 0.061 |
| cFDA800_1 | 77  | Docetaxel (Taxotere)                           | H15 | 0.926 | 0.021 | 0.813 | 0.017 |
| cFDA800_3 | 671 | Nilutamide                                     | E17 | 0.926 | 0.108 | 0.966 | 0.056 |
| cFDA800_1 | 59  | Risperidone                                    | F19 | 0.927 | 0.06  | 0.965 | 0.065 |
| cFDA800_3 | 672 | Nitazoxanide                                   | E19 | 0.927 | 0.006 | 0.942 | 0.082 |
| cFDA800_3 | 758 | Terbutaline Hemisulfate                        | F12 | 0.927 | 0.031 | 0.839 | 0.074 |

|           |     |                         |     |       |       |       |       |
|-----------|-----|-------------------------|-----|-------|-------|-------|-------|
| cFDA800_2 | 352 | Amoxicillin             | D5  | 0.928 | 0.077 | 0.918 | 0.069 |
| cFDA800_3 | 680 | Oxazepam                | F15 | 0.928 | 0.06  | 0.889 | 0.234 |
| cFDA800_3 | 692 | Pentamidine Isethionate | G19 | 0.928 | 0.063 | 0.975 | 0.02  |
| cFDA800_3 | 725 | Repaglinide             | C6  | 0.928 | 0.064 | 0.988 | 0.165 |
| cFDA800_2 | 405 | Aminohippurate·Na       | C6  | 0.93  | 0.066 | 0.913 | 0.071 |
| cFDA800_3 | 753 | Telithromycin           | E22 | 0.93  | 0.071 | 0.992 | 0.236 |
| cFDA800_3 | 729 | Rifaximin               | C14 | 0.931 | 0.17  | 0.895 | 0.086 |
| cFDA800_2 | 407 | Amlexanox               | C10 | 0.932 | 0.068 | 0.965 | 0.134 |
| cFDA800_3 | 535 | Eplerenone              | N5  | 0.932 | 0.238 | 1.085 | 0.149 |
| cFDA800_2 | 357 | Venlafaxine·HCl         | D15 | 0.933 | 0.08  | 0.863 | 0.121 |
| cFDA800_1 | 207 | Vinorelbine             | M15 | 0.934 | 0.073 | 0.88  | 0.033 |
| cFDA800_1 | 208 | Salmeterol              | M17 | 0.935 | 0.064 | 0.89  | 0.081 |
| cFDA800_2 | 350 | Toremifene Base         | C21 | 0.936 | 0.046 | 0.962 | 0.07  |
| cFDA800_1 | 110 | Dofetilide              | C22 | 0.937 | 0.079 | 1.064 | 0.059 |
| cFDA800_1 | 175 | Bexarotene              | J11 | 0.938 | 0.046 | 0.932 | 0.126 |
| cFDA800_2 | 359 | Ketotifen Fumarate      | D19 | 0.938 | 0.026 | 0.856 | 0.074 |
| cFDA800_1 | 129 | Calcitriol              | E20 | 0.94  | 0.011 | 0.92  | 0.027 |
| cFDA800_3 | 662 | Naratriptan·HCl         | D19 | 0.941 | 0.057 | 1.08  | 0.199 |
| cFDA800_3 | 727 | Rifabutin               | C10 | 0.941 | 0.09  | 1.046 | 0.185 |
| cFDA800_3 | 763 | Theophylline            | F22 | 0.942 | 0.065 | 1.032 | 0.125 |
| cFDA800_3 | 773 | Tolvaptan               | G22 | 0.942 | 0.032 | 1.078 | 0.128 |
| cFDA800_3 | 696 | Perphenazine            | H7  | 0.943 | 0.085 | 1.029 | 0.149 |
| cFDA800_3 | 324 | Prednisolone            | M9  | 0.945 | 0.075 | 1.101 | 0.253 |
| cFDA800_2 | 435 | Budesonide              | F6  | 0.945 | 0.052 | 0.948 | 0.026 |
| cFDA800_3 | 694 | Perindopril Erbumine    | H3  | 0.945 | 0.054 | 1.027 | 0.051 |
| cFDA800_1 | 228 | Bisacodyl               | O17 | 0.947 | 0.082 | 0.728 | 0.057 |
| cFDA800_3 | 688 | Pemetrexed Disodium     | G11 | 0.947 | 0.088 | 1.073 | 0.096 |
| cFDA800_3 | 778 | Trazodone·HCl           | H12 | 0.947 | 0.084 | 0.962 | 0.104 |
| cFDA800_3 | 782 | Triazolam               | H20 | 0.947 | 0.057 | 1.035 | 0.153 |
| cFDA800_3 | 748 | Sunitinib Malate        | E12 | 0.948 | 0.05  | 0.925 | 0.156 |
| cFDA800_2 | 398 | Almotriptan             | B12 | 0.949 | 0.045 | 1.069 | 0.049 |
| cFDA800_3 | 686 | Paromomycin Sulfate     | G7  | 0.95  | 0.086 | 0.937 | 0.017 |
| cFDA800_3 | 746 | Sulfamethoxazole        | E8  | 0.95  | 0.051 | 0.958 | 0.098 |
| cFDA800_1 | 106 | Exemestane              | C14 | 0.951 | 0.058 | 0.988 | 0.052 |
| cFDA800_3 | 384 | Abacavir Sulfate        | M4  | 0.951 | 0.191 | 1.091 | 0.175 |
| cFDA800_2 | 399 | Alosetron·HCl           | B14 | 0.951 | 0.041 | 1.003 | 0.061 |
| cFDA800_3 | 754 | Temazepam               | F4  | 0.951 | 0.03  | 1.033 | 0.182 |
| cFDA800_1 | 36  | Maprotiline·HCl         | D13 | 0.952 | 0.034 | 0.94  | 0.098 |
| cFDA800_2 | 421 | Balsalazide             | D18 | 0.952 | 0.025 | 0.905 | 0.022 |
| cFDA800_1 | 104 | Idarubicin·HCl          | C10 | 0.953 | 0.05  | 0.807 | 0.04  |

|           |     |                                 |     |       |       |       |       |
|-----------|-----|---------------------------------|-----|-------|-------|-------|-------|
| cFDA800_2 | 348 | Tobramycin                      | C17 | 0.953 | 0.04  | 0.929 | 0.023 |
| cFDA800_2 | 400 | Blank                           | B16 | 0.953 | 0.011 | 1.041 | 0.015 |
| cFDA800_3 | 625 | Mequinol                        | O5  | 0.953 | 0.162 | 1.038 | 0.157 |
| cFDA800_1 | 165 | Sulindac                        | I11 | 0.954 | 0.045 | 0.996 | 0.073 |
| cFDA800_1 | 128 | Acitretin                       | E18 | 0.955 | 0.036 | 0.949 | 0.022 |
| cFDA800_1 | 246 | Crotamiton                      | I14 | 0.955 | 0.055 | 1.024 | 0.066 |
| cFDA800_2 | 420 | Baclofen                        | D16 | 0.955 | 0.048 | 0.889 | 0.096 |
| cFDA800_3 | 743 | Streptozocin                    | D22 | 0.955 | 0.066 | 1.075 | 0.153 |
| cFDA800_3 | 790 | Valganciclovir·HCl              | I15 | 0.955 | 0.049 | 0.983 | 0.019 |
| cFDA800_3 | 85  | Azathioprine                    | K12 | 0.956 | 0.057 | 0.961 | 0.093 |
| cFDA800_2 | 444 | Cefaclor                        | G4  | 0.956 | 0.021 | 0.949 | 0.021 |
| cFDA800_1 | 168 | Zafirlukast                     | I17 | 0.957 | 0.02  | 0.999 | 0.089 |
| cFDA800_2 | 443 | Carmustine                      | F22 | 0.957 | 0.042 | 0.973 | 0.012 |
| cFDA800_1 | 151 | Simvastatin                     | H4  | 0.958 | 0.007 | 0.884 | 0.105 |
| cFDA800_1 | 171 | Diazoxide                       | J3  | 0.958 | 0.038 | 1.18  | 0.306 |
| cFDA800_1 | 245 | Orphenadrine Citrate            | I12 | 0.958 | 0.026 | 0.957 | 0.017 |
| cFDA800_1 | 249 | Dacarbazine                     | I20 | 0.96  | 0.018 | 0.961 | 0.013 |
| cFDA800_3 | 682 | Oxybutynin Chloride             | F19 | 0.96  | 0.106 | 0.812 | 0.233 |
| cFDA800_1 | 39  | Tropicamide                     | D19 | 0.961 | 0.032 | 0.896 | 0.075 |
| cFDA800_2 | 356 | Vecuronium Bromide              | D13 | 0.961 | 0.044 | 0.907 | 0.054 |
| cFDA800_3 | 635 | Methocarbamol                   | B5  | 0.961 | 0.109 | 0.906 | 0.221 |
| cFDA800_3 | 767 | Tiagabine·HCl                   | G10 | 0.961 | 0.053 | 1.063 | 0.141 |
| cFDA800_1 | 99  | Tizanidine·HCl                  | B20 | 0.962 | 0.035 | 0.989 | 0.02  |
| cFDA800_2 | 336 | Propranolol·HCl                 | B13 | 0.962 | 0.063 | 0.979 | 0.056 |
| cFDA800_2 | 396 | Blank                           | B8  | 0.962 | 0.008 | 1.047 | 0.079 |
| cFDA800_2 | 429 | Bimatoprost                     | E14 | 0.962 | 0.054 | 0.928 | 0.071 |
| cFDA800_3 | 681 | Oxtriphylline                   | F17 | 0.962 | 0.024 | 1.021 | 0.232 |
| cFDA800_3 | 690 | Penicillamine (D-Penicillamine) | G15 | 0.962 | 0.091 | 0.972 | 0.091 |
| cFDA800_2 | 413 | Asenapine Maleate               | C22 | 0.963 | 0.017 | 0.948 | 0.043 |
| cFDA800_3 | 683 | Oxytetracycline·HCl             | F21 | 0.963 | 0.027 | 0.96  | 0.128 |
| cFDA800_1 | 67  | Amoxapine                       | G15 | 0.964 | 0.018 | 0.98  | 0.069 |
| cFDA800_1 | 74  | Clemastine Fumarate             | H9  | 0.964 | 0.045 | 0.948 | 0.04  |
| cFDA800_2 | 345 | Tetracycline                    | C11 | 0.964 | 0.034 | 0.908 | 0.032 |
| cFDA800_2 | 397 | Alitretinoin                    | B10 | 0.964 | 0.035 | 1.054 | 0.052 |
| cFDA800_3 | 742 | Stavudine                       | D20 | 0.964 | 0.063 | 0.657 | 0.505 |
| cFDA800_3 | 800 | Ziprasidone                     | J15 | 0.964 | 0.061 | 1.118 | 0.154 |
| cFDA800_1 | 60  | Diphenhydramine·HCl             | F21 | 0.965 | 0.032 | 0.929 | 0.096 |
| cFDA800_1 | 177 | Celecoxib                       | J15 | 0.965 | 0.073 | 1.001 | 0.115 |
| cFDA800_2 | 340 | Sulfadiazine                    | B21 | 0.965 | 0.035 | 1.011 | 0.021 |
| cFDA800_2 | 369 | Argatroban                      | E19 | 0.965 | 0.037 | 0.961 | 0.085 |

|           |     |                         |     |       |       |       |       |
|-----------|-----|-------------------------|-----|-------|-------|-------|-------|
| cFDA800_3 | 689 | Pemirolast Potassium    | G13 | 0.965 | 0.033 | 1.016 | 0.132 |
| cFDA800_3 | 724 | Regadenoson             | C4  | 0.965 | 0.05  | 1.065 | 0.152 |
| cFDA800_2 | 365 | Amrinone                | E11 | 0.966 | 0.063 | 0.977 | 0.084 |
| cFDA800_3 | 673 | Nitisinone              | E21 | 0.966 | 0.08  | 1.059 | 0.133 |
| cFDA800_3 | 702 | Blank                   | H19 | 0.966 | 0.095 | 0.986 | 0.155 |
| cFDA800_3 | 749 | Tacrolimus (Fk506)      | E14 | 0.966 | 0.077 | 1.007 | 0.211 |
| cFDA800_1 | 178 | Levetiracetam           | J17 | 0.967 | 0.017 | 0.968 | 0.07  |
| cFDA800_2 | 457 | Cefuroxime Axetil       | H10 | 0.967 | 0.036 | 0.971 | 0.041 |
| cFDA800_2 | 576 | Hexachlorophene         | L8  | 0.967 | 0.041 | 0.949 | 0.063 |
| cFDA800_3 | 659 | Nadolol                 | D13 | 0.967 | 0.101 | 0.625 | 0.496 |
| cFDA800_1 | 109 | Anagrelide              | C20 | 0.968 | 0.031 | 0.919 | 0.03  |
| cFDA800_2 | 331 | Ranolazine·2HCl         | B3  | 0.968 | 0.028 | 1.039 | 0.042 |
| cFDA800_2 | 339 | Streptomycin Sulfate    | B19 | 0.968 | 0.028 | 1.071 | 0.045 |
| cFDA800_3 | 676 | Nortriptyline·HCl       | F7  | 0.968 | 0.069 | 0.982 | 0.201 |
| cFDA800_3 | 687 | Pazopanib·HCl           | G9  | 0.968 | 0.051 | 0.616 | 0.527 |
| cFDA800_1 | 41  | Ivermectin              | E3  | 0.969 | 0.008 | 1.008 | 0.028 |
| cFDA800_2 | 454 | Ceftibuten              | H4  | 0.969 | 0.044 | 1.019 | 0.033 |
| cFDA800_3 | 674 | Nitrofurantoin          | F3  | 0.969 | 0.072 | 1.035 | 0.251 |
| cFDA800_3 | 741 | Sorafenib Tosylate      | D18 | 0.969 | 0.077 | 1.037 | 0.123 |
| cFDA800_3 | 744 | Sulconazole Nitrate     | E4  | 0.969 | 0.133 | 0.615 | 0.498 |
| cFDA800_1 | 79  | Tolcapone               | H19 | 0.97  | 0.045 | 0.997 | 0.084 |
| cFDA800_2 | 408 | Amphotericin B          | C12 | 0.97  | 0.051 | 0.913 | 0.086 |
| cFDA800_3 | 734 | Rosuvastatin Calcium    | D4  | 0.97  | 0.028 | 1.004 | 0.161 |
| cFDA800_1 | 139 | Bumetanide              | F20 | 0.971 | 0.032 | 0.977 | 0.144 |
| cFDA800_3 | 760 | Testosterone Enanthate  | F16 | 0.971 | 0.048 | 1.024 | 0.136 |
| cFDA800_1 | 16  | Quinine·HCl·H2O         | B13 | 0.972 | 0.02  | 1.052 | 0.136 |
| cFDA800_2 | 463 | Chlorothiazide          | H22 | 0.972 | 0.016 | 0.974 | 0.07  |
| cFDA800_3 | 663 | Natamycin               | D21 | 0.972 | 0.052 | 0.914 | 0.15  |
| cFDA800_3 | 768 | Tigecycline             | G12 | 0.972 | 0.003 | 1.024 | 0.099 |
| cFDA800_3 | 774 | Topiramate              | H4  | 0.972 | 0.05  | 1.021 | 0.036 |
| cFDA800_1 | 35  | Sotalol·HCl             | D11 | 0.973 | 0.028 | 0.939 | 0.022 |
| cFDA800_1 | 154 | Rifampin (Rifampicin)   | H10 | 0.973 | 0.025 | 0.939 | 0.066 |
| cFDA800_3 | 231 | Carbamazepine           | L3  | 0.973 | 0.026 | 0.796 | 0.403 |
| cFDA800_1 | 241 | Clarithromycin          | I4  | 0.973 | 0.034 | 1.133 | 0.049 |
| cFDA800_3 | 320 | Penciclovir             | L22 | 0.973 | 0.033 | 1.171 | 0.349 |
| cFDA800_2 | 337 | Scopolamine·HBr         | B15 | 0.973 | 0.037 | 0.957 | 0.043 |
| cFDA800_2 | 411 | Articaine·HCl           | C18 | 0.973 | 0.065 | 0.983 | 0.032 |
| cFDA800_3 | 653 | Mirtazapine             | C21 | 0.973 | 0.078 | 1.005 | 0.113 |
| cFDA800_3 | 655 | Modafinil (Schedule Iv) | D5  | 0.973 | 0.037 | 1.051 | 0.129 |
| cFDA800_3 | 695 | Permethrin              | H5  | 0.973 | 0.05  | 0.755 | 0.408 |

|           |     |                             |     |       |       |       |       |
|-----------|-----|-----------------------------|-----|-------|-------|-------|-------|
| cFDA800_1 | 111 | Erlotinib                   | D4  | 0.974 | 0.053 | 0.993 | 0.052 |
| cFDA800_3 | 645 | Blank                       | C5  | 0.974 | 0.071 | 0.812 | 0.355 |
| cFDA800_3 | 776 | Trandolapril                | H8  | 0.974 | 0.015 | 1.052 | 0.194 |
| cFDA800_1 | 52  | Nateglinide                 | F5  | 0.975 | 0.03  | 0.911 | 0.012 |
| cFDA800_2 | 353 | Tramadol·HCl                | D7  | 0.975 | 0.031 | 0.856 | 0.058 |
| cFDA800_2 | 441 | Carglumic Acid              | F18 | 0.975 | 0.043 | 0.921 | 0.087 |
| cFDA800_2 | 581 | Hydroxocobalamin·HCl        | L18 | 0.975 | 0.064 | 0.993 | 0.118 |
| cFDA800_3 | 643 | Metolazone                  | B21 | 0.975 | 0.072 | 1.159 | 0.153 |
| cFDA800_3 | 771 | Tirofiban·HCl               | G18 | 0.975 | 0.073 | 0.671 | 0.57  |
| cFDA800_2 | 354 | Trimethoprim                | D9  | 0.976 | 0.028 | 0.85  | 0.038 |
| cFDA800_2 | 402 | Amcinonide                  | B20 | 0.976 | 0.031 | 1.038 | 0.053 |
| cFDA800_3 | 675 | Nizatidine                  | F5  | 0.976 | 0.118 | 0.961 | 0.068 |
| cFDA800_3 | 786 | Trimethobenzamide·HCl       | I7  | 0.976 | 0.043 | 0.998 | 0.052 |
| cFDA800_3 | 797 | Warfarin·Na                 | J9  | 0.976 | 0.035 | 0.966 | 0.173 |
| cFDA800_1 | 25  | Clonidine·HCl               | C11 | 0.977 | 0.046 | 0.947 | 0.022 |
| cFDA800_1 | 143 | Tranlycypromine Hemisulfate | G8  | 0.977 | 0.046 | 0.939 | 0.08  |
| cFDA800_2 | 333 | Ribavirin                   | B7  | 0.977 | 0.011 | 1.15  | 0.228 |
| cFDA800_2 | 461 | Blank                       | H18 | 0.977 | 0.035 | 1.059 | 0.093 |
| cFDA800_3 | 684 | Paliperidone                | G3  | 0.977 | 0.042 | 1.118 | 0.175 |
| cFDA800_3 | 787 | Trimipramine Maleate        | I9  | 0.977 | 0.055 | 1.069 | 0.251 |
| cFDA800_3 | 796 | Voriconazole                | J7  | 0.977 | 0.013 | 1.048 | 0.08  |
| cFDA800_1 | 142 | Captopril                   | G6  | 0.978 | 0.042 | 1.055 | 0.079 |
| cFDA800_2 | 403 | Amikacin Disulfate          | B22 | 0.978 | 0.063 | 1.037 | 0.04  |
| cFDA800_2 | 412 | L-Ascorbic Acid             | C20 | 0.978 | 0.044 | 0.961 | 0.104 |
| cFDA800_2 | 530 | Econazole Nitrate           | O15 | 0.978 | 0.044 | 1.026 | 0.083 |
| cFDA800_3 | 728 | Rifapentine                 | C12 | 0.978 | 0.049 | 1     | 0.119 |
| cFDA800_1 | 18  | Phenytoin                   | B17 | 0.979 | 0.032 | 1.135 | 0.162 |
| cFDA800_1 | 150 | Sodium Phenylbutyrate       | G22 | 0.979 | 0.012 | 0.963 | 0.093 |
| cFDA800_1 | 153 | Raloxifene·HCl              | H8  | 0.979 | 0.024 | 1.051 | 0.088 |
| cFDA800_2 | 338 | Spironolactone              | B17 | 0.979 | 0.07  | 1.064 | 0.037 |
| cFDA800_2 | 375 | Aprepitant                  | F11 | 0.979 | 0.041 | 1.044 | 0.201 |
| cFDA800_3 | 387 | Acebutolol·HCl              | M10 | 0.979 | 0.05  | 0.986 | 0.076 |
| cFDA800_2 | 566 | Formoterol                  | K8  | 0.979 | 0.062 | 0.953 | 0.111 |
| cFDA800_3 | 665 | Nelarabine                  | E5  | 0.979 | 0.04  | 1.036 | 0.161 |
| cFDA800_3 | 732 | Ropinirole·HCl              | C20 | 0.979 | 0.033 | 1.063 | 0.166 |
| cFDA800_1 | 28  | Emtricitabine               | C17 | 0.98  | 0.04  | 0.87  | 0.053 |
| cFDA800_1 | 31  | (S)-Timolol Maleate         | D3  | 0.98  | 0.017 | 1.034 | 0.104 |
| cFDA800_1 | 91  | Candesartan                 | B4  | 0.98  | 0.036 | 1.122 | 0.102 |
| cFDA800_2 | 344 | Terazosin·HCl               | C9  | 0.98  | 0.036 | 1.029 | 0.005 |
| cFDA800_2 | 419 | Bacitracin                  | D14 | 0.98  | 0.049 | 0.909 | 0.075 |



|           |     |                                                 |     |       |       |       |       |
|-----------|-----|-------------------------------------------------|-----|-------|-------|-------|-------|
| cFDA800_2 | 481 | Cloxacillin·Na                                  | J17 | 0.98  | 0.005 | 0.977 | 0.024 |
| cFDA800_3 | 651 | Miglitol                                        | C17 | 0.98  | 0.053 | 1.017 | 0.15  |
| cFDA800_3 | 699 | Phytonadione                                    | H13 | 0.98  | 0.03  | 0.965 | 0.129 |
| cFDA800_3 | 770 | Tiopronin                                       | G16 | 0.98  | 0.044 | 0.973 | 0.07  |
| cFDA800_1 | 61  | Promethazine·HCl                                | G3  | 0.981 | 0.048 | 0.968 | 0.055 |
| cFDA800_1 | 118 | Nimodipine                                      | D18 | 0.981 | 0.05  | 0.935 | 0.057 |
| cFDA800_1 | 260 | Esomeprazole Potassium                          | J22 | 0.981 | 0.044 | 0.956 | 0.091 |
| cFDA800_2 | 401 | Ambrisentan                                     | B18 | 0.981 | 0.032 | 1.002 | 0.093 |
| cFDA800_1 | 19  | Procainamide·HCl                                | B19 | 0.982 | 0.013 | 1.108 | 0.139 |
| cFDA800_1 | 26  | Guanabenz Acetate                               | C13 | 0.982 | 0.026 | 0.976 | 0.047 |
| cFDA800_1 | 27  | Dihydroergotamine Mesylate                      | C15 | 0.982 | 0.086 | 1.001 | 0.044 |
| cFDA800_3 | 88  | Sertaconazole                                   | K18 | 0.982 | 0.165 | 1.072 | 0.043 |
| cFDA800_1 | 131 | Cromolyn·Na (Disodium Cromoglycate)             | F4  | 0.982 | 0.046 | 0.989 | 0.137 |
| cFDA800_3 | 656 | Moexipril·HCl                                   | D7  | 0.982 | 0.052 | 1.125 | 0.258 |
| cFDA800_3 | 677 | Olsalazine·Na                                   | F9  | 0.982 | 0.064 | 1.007 | 0.086 |
| cFDA800_3 | 693 | Pentostatin                                     | G21 | 0.982 | 0.017 | 0.977 | 0.053 |
| cFDA800_3 | 720 | Rabeprazole·Na                                  | B16 | 0.982 | 0.032 | 0.972 | 0.22  |
| cFDA800_1 | 68  | Metoclopramide·HCl                              | G17 | 0.983 | 0.036 | 1.005 | 0.054 |
| cFDA800_3 | 86  | Sildenafil Citrate                              | K14 | 0.983 | 0.067 | 0.97  | 0.076 |
| cFDA800_1 | 124 | Latanoprost                                     | E10 | 0.983 | 0.045 | 1.066 | 0.027 |
| cFDA800_2 | 346 | Temozolomide                                    | C13 | 0.983 | 0.046 | 0.971 | 0.045 |
| cFDA800_2 | 395 | Adenosine                                       | B6  | 0.983 | 0.022 | 1.192 | 0.049 |
| cFDA800_2 | 438 | Butorphanol-(+)-Tartrate (Schedule Iv)          | F12 | 0.983 | 0.081 | 0.936 | 0.073 |
| cFDA800_2 | 490 | Dactinomycin (= Actinomycin D)                  | K15 | 0.983 | 0.054 | 0.962 | 0.116 |
| cFDA800_3 | 650 | Midodrine·HCl                                   | C15 | 0.983 | 0.056 | 1.062 | 0.119 |
| cFDA800_3 | 679 | Oxaprozin                                       | F13 | 0.983 | 0.055 | 0.933 | 0.133 |
| cFDA800_3 | 715 | Protriptyline·HCl                               | B6  | 0.983 | 0.04  | 0.932 | 0.113 |
| cFDA800_3 | 718 | Pyrimethamine                                   | B12 | 0.983 | 0.064 | 1.036 | 0.078 |
| cFDA800_1 | 13  | Tolbutamide                                     | B7  | 0.984 | 0.029 | 1.052 | 0.14  |
| cFDA800_1 | 44  | Zonisamide                                      | E9  | 0.984 | 0.034 | 1.056 | 0.08  |
| cFDA800_2 | 360 | Naloxone·HCl                                    | D21 | 0.984 | 0.017 | 0.862 | 0.093 |
| cFDA800_3 | 745 | Sulfacetamide·Na                                | E6  | 0.984 | 0.073 | 1.018 | 0.143 |
| cFDA800_3 | 765 | Thiotepa                                        | G6  | 0.984 | 0.078 | 1.056 | 0.138 |
| cFDA800_2 | 428 | Bethanechol Chloride                            | E12 | 0.985 | 0.078 | 0.947 | 0.086 |
| cFDA800_2 | 440 | Carbinoxamine Maleate                           | F16 | 0.985 | 0.007 | 0.893 | 0.056 |
| cFDA800_2 | 473 | Cisplatin (Cis-Diamineplatinum(II) Dichloride ) | I21 | 0.985 | 0.072 | 1.003 | 0.133 |
| cFDA800_3 | 794 | Varenicline Tartrate                            | J3  | 0.985 | 0.019 | 1.108 | 0.055 |
| cFDA800_1 | 47  | Zolmitriptan                                    | E15 | 0.986 | 0.013 | 0.935 | 0.103 |
| cFDA800_1 | 64  | Norepinephrine Bitartrate Monohydrate           | G9  | 0.986 | 0.016 | 0.962 | 0.024 |
| cFDA800_1 | 160 | Cetirizine 2HCl                                 | H22 | 0.986 | 0.031 | 0.922 | 0.109 |



|           |     |                                           |     |       |       |       |       |
|-----------|-----|-------------------------------------------|-----|-------|-------|-------|-------|
| cFDA800_2 | 448 | Cefditoren Pivoxil                        | G12 | 0.986 | 0.037 | 0.945 | 0.03  |
| cFDA800_2 | 511 | Diatrizoate Meglumine                     | M17 | 0.986 | 0.017 | 0.96  | 0.031 |
| cFDA800_3 | 615 | Malathion                                 | N6  | 0.986 | 0.072 | 1.005 | 0.153 |
| cFDA800_3 | 660 | Nafcillin·Na                              | D15 | 0.986 | 0.067 | 1.054 | 0.204 |
| cFDA800_3 | 751 | Tazarotene                                | E18 | 0.986 | 0.061 | 1.034 | 0.142 |
| cFDA800_1 | 17  | Propafenone·HCl                           | B15 | 0.987 | 0.028 | 0.964 | 0.005 |
| cFDA800_1 | 22  | Rosiglitazone                             | C5  | 0.987 | 0.097 | 1.039 | 0.077 |
| cFDA800_1 | 116 | Diltiazem·HCl                             | D14 | 0.987 | 0.023 | 0.944 | 0.043 |
| cFDA800_1 | 155 | Etoposide                                 | H12 | 0.987 | 0.072 | 0.918 | 0.025 |
| cFDA800_3 | 233 | Ceftazidime                               | L7  | 0.987 | 0.055 | 0.924 | 0.134 |
| cFDA800_3 | 733 | Ropivacaine·HCl Monohydrate               | C22 | 0.987 | 0.057 | 1.023 | 0.149 |
| cFDA800_1 | 71  | Famotidine                                | H3  | 0.988 | 0.022 | 0.996 | 0.077 |
| cFDA800_2 | 418 | Azelastine·HCl                            | D12 | 0.988 | 0.027 | 0.928 | 0.034 |
| cFDA800_2 | 442 | Blank                                     | F20 | 0.988 | 0.022 | 0.882 | 0.081 |
| cFDA800_1 | 21  | Flecainide Acetate                        | C3  | 0.989 | 0.027 | 1.005 | 0.011 |
| cFDA800_1 | 80  | Olmesartan                                | H21 | 0.989 | 0.064 | 0.891 | 0.095 |
| cFDA800_1 | 176 | Tranexamic Acid                           | J13 | 0.989 | 0.032 | 0.971 | 0.067 |
| cFDA800_1 | 218 | Amifostine                                | N17 | 0.989 | 0.039 | 0.926 | 0.085 |
| cFDA800_1 | 242 | Clomiphene Citrate                        | I6  | 0.989 | 0.061 | 1.016 | 0.062 |
| cFDA800_1 | 243 | Clopidogrel Hydrogen Sulfate              | I8  | 0.989 | 0.028 | 0.986 | 0.08  |
| cFDA800_1 | 267 | Fenofibrate                               | K16 | 0.989 | 0.019 | 0.984 | 0.091 |
| cFDA800_2 | 342 | Tamsulosin·HCl                            | C5  | 0.989 | 0.089 | 0.957 | 0.022 |
| cFDA800_2 | 363 | Tiotropium Bromide Monohydrate            | E7  | 0.989 | 0.045 | 0.979 | 0.11  |
| cFDA800_2 | 371 | Butoconazole Nitrate                      | F3  | 0.989 | 0.029 | 0.943 | 0.047 |
| cFDA800_2 | 434 | Brompheniramine Maleate                   | F4  | 0.989 | 0.05  | 0.922 | 0.101 |
| cFDA800_2 | 458 | Cefuroxime·Na                             | H12 | 0.989 | 0.066 | 0.969 | 0.103 |
| cFDA800_2 | 571 | Glycopyrrolate Iodide                     | K18 | 0.989 | 0.013 | 0.999 | 0.024 |
| cFDA800_3 | 691 | Penicillin G Potassium (Benzylpenicillin) | G17 | 0.989 | 0.103 | 1.026 | 0.061 |
| cFDA800_3 | 739 | Silver Sulfadiazine                       | D14 | 0.989 | 0.08  | 1.084 | 0.219 |
| cFDA800_3 | 9   | Amiodarone·HCl                            | K19 | 0.99  | 0.047 | 0.865 | 0.142 |
| cFDA800_1 | 11  | Pimozide                                  | B3  | 0.99  | 0.038 | 1.1   | 0.001 |
| cFDA800_1 | 40  | Pancuronium·2Br                           | D21 | 0.99  | 0.04  | 0.944 | 0.074 |
| cFDA800_2 | 404 | Aminocaproic Acid                         | C4  | 0.99  | 0.07  | 1.012 | 0.122 |
| cFDA800_2 | 486 | Cyclobenzaprine·HCl                       | K7  | 0.99  | 0.08  | 1.058 | 0.07  |
| cFDA800_3 | 634 | Methenamine Hippurate                     | B3  | 0.99  | 0.05  | 1.168 | 0.142 |
| cFDA800_1 | 37  | Pilocarpine·HCl                           | D15 | 0.991 | 0.005 | 0.976 | 0.089 |
| cFDA800_1 | 45  | Zoledronic Acid Monohydrate               | E11 | 0.991 | 0.039 | 0.973 | 0.017 |
| cFDA800_1 | 69  | Nalbuphine·HCl Dihydrate                  | G19 | 0.991 | 0.055 | 0.951 | 0.049 |
| cFDA800_1 | 127 | Clozapine                                 | E16 | 0.991 | 0.022 | 0.956 | 0.016 |
| cFDA800_1 | 250 | Danazol                                   | I22 | 0.991 | 0.014 | 1.007 | 0.037 |

|           |     |                             |     |       |       |       |       |
|-----------|-----|-----------------------------|-----|-------|-------|-------|-------|
| cFDA800_2 | 415 | Atorvastatin Calcium        | D6  | 0.991 | 0.007 | 0.967 | 0.041 |
| cFDA800_1 | 98  | Guanfacine·HCl              | B18 | 0.992 | 0.032 | 0.985 | 0.04  |
| cFDA800_1 | 101 | Flumazenil                  | C4  | 0.992 | 0.056 | 1.012 | 0.079 |
| cFDA800_1 | 112 | Tacrine·HCl                 | D6  | 0.992 | 0.021 | 0.926 | 0.129 |
| cFDA800_1 | 184 | Didanosine                  | K9  | 0.992 | 0.028 | 0.961 | 0.024 |
| cFDA800_1 | 251 | Desloratadine               | J4  | 0.992 | 0.064 | 1.071 | 0.119 |
| cFDA800_1 | 261 | Estradiol                   | K4  | 0.992 | 0.043 | 0.991 | 0.059 |
| cFDA800_2 | 351 | Tolmetin·Na                 | D3  | 0.992 | 0.035 | 0.945 | 0.057 |
| cFDA800_2 | 501 | Demeclocycline·HCl          | L17 | 0.992 | 0.059 | 0.945 | 0.067 |
| cFDA800_2 | 559 | Fluocinonide                | J14 | 0.992 | 0.065 | 0.931 | 0.08  |
| cFDA800_3 | 738 | Sertraline·HCl              | D12 | 0.992 | 0.056 | 1.012 | 0.176 |
| cFDA800_3 | 755 | Temsirolimus                | F6  | 0.992 | 0.077 | 0.906 | 0.198 |
| cFDA800_3 | 791 | Valproate·Na                | I17 | 0.992 | 0.058 | 1.079 | 0.139 |
| cFDA800_3 | 792 | Valsartan                   | I19 | 0.992 | 0.051 | 0.689 | 0.552 |
| cFDA800_3 | 5   | Lincomycin·HCl              | K11 | 0.993 | 0.036 | 1.007 | 0.108 |
| cFDA800_1 | 117 | Nifedipine                  | D16 | 0.993 | 0.034 | 0.978 | 0.052 |
| cFDA800_2 | 366 | Milrinone                   | E13 | 0.993 | 0.035 | 1.041 | 0.078 |
| cFDA800_2 | 406 | Aminolevulinic Acid·HCl     | C8  | 0.993 | 0.098 | 0.988 | 0.102 |
| cFDA800_2 | 472 | Cisatracurium Besylate      | I19 | 0.993 | 0.017 | 0.996 | 0.059 |
| cFDA800_3 | 764 | Thioguanine (6-Thioguanine) | G4  | 0.993 | 0.053 | 1.056 | 0.12  |
| cFDA800_1 | 20  | Lidocaine·HCl·H2O           | B21 | 0.994 | 0.042 | 0.941 | 0.068 |
| cFDA800_1 | 48  | Memantine·HCl               | E17 | 0.994 | 0.019 | 0.977 | 0.087 |
| cFDA800_3 | 83  | Lovastatin                  | K8  | 0.994 | 0.038 | 1.027 | 0.042 |
| cFDA800_1 | 114 | Amiloride·HCl·2H2O          | D10 | 0.994 | 0.012 | 0.997 | 0.083 |
| cFDA800_1 | 181 | Bicalutamide                | K3  | 0.994 | 0.019 | 1.069 | 0.12  |
| cFDA800_2 | 349 | Topotecan·HCl               | C19 | 0.994 | 0.016 | 0.959 | 0.031 |
| cFDA800_2 | 367 | Alprostadil                 | E15 | 0.994 | 0.017 | 0.946 | 0.063 |
| cFDA800_3 | 540 | Eszopiclone                 | N15 | 0.994 | 0.062 | 1.048 | 0.179 |
| cFDA800_3 | 769 | Tiludronate Disodium        | G14 | 0.994 | 0.081 | 1.099 | 0.142 |
| cFDA800_3 | 784 | Trihexyphenidyl·HCl         | I3  | 0.994 | 0     | 0.959 | 0.142 |
| cFDA800_1 | 14  | Glipizide                   | B9  | 0.995 | 0.025 | 0.992 | 0.12  |
| cFDA800_1 | 102 | Gefitinib                   | C6  | 0.995 | 0.05  | 0.872 | 0.048 |
| cFDA800_2 | 455 | Ceftizoxim·Na               | H6  | 0.995 | 0.037 | 1.056 | 0.073 |
| cFDA800_3 | 637 | Methoxsalen (Xanthotoxin)   | B9  | 0.995 | 0.075 | 1.079 | 0.154 |
| cFDA800_3 | 639 | Methsuximide                | B13 | 0.995 | 0.084 | 1.044 | 0.129 |
| cFDA800_1 | 95  | Eprosartan Mesylate         | B12 | 0.996 | 0.054 | 1.028 | 0.113 |
| cFDA800_1 | 169 | Zileuton                    | I19 | 0.996 | 0.058 | 0.944 | 0.074 |
| cFDA800_1 | 268 | Finasteride                 | K18 | 0.996 | 0.053 | 0.932 | 0.048 |
| cFDA800_2 | 483 | Colistimethate·Na           | J21 | 0.996 | 0.013 | 1.013 | 0.068 |
| cFDA800_2 | 545 | Ethosuximide                | I6  | 0.996 | 0.036 | 1.026 | 0.1   |

|           |     |                               |     |       |       |       |       |
|-----------|-----|-------------------------------|-----|-------|-------|-------|-------|
| cFDA800_1 | 258 | Doxycycline Monohydrate       | J18 | 0.997 | 0.015 | 0.909 | 0.058 |
| cFDA800_2 | 347 | Tinidazole                    | C15 | 0.997 | 0.008 | 0.958 | 0.028 |
| cFDA800_3 | 640 | Methyclothiazide              | B15 | 0.997 | 0.045 | 1.118 | 0.114 |
| cFDA800_3 | 642 | Methylergonovine Maleate      | B19 | 0.997 | 0.057 | 1.117 | 0.157 |
| cFDA800_3 | 775 | Torsemide                     | H6  | 0.997 | 0.063 | 1.052 | 0.045 |
| cFDA800_1 | 66  | Imipramine·HCl                | G13 | 0.998 | 0.095 | 1.005 | 0.041 |
| cFDA800_1 | 76  | Linezolid                     | H13 | 0.998 | 0.058 | 1.033 | 0.12  |
| cFDA800_1 | 108 | Metformin·HCl                 | C18 | 0.998 | 0.078 | 0.925 | 0.062 |
| cFDA800_1 | 125 | Alfuzosin                     | E12 | 0.998 | 0.051 | 0.95  | 0.032 |
| cFDA800_1 | 137 | Naproxen                      | F16 | 0.998 | 0.058 | 0.91  | 0.056 |
| cFDA800_3 | 319 | Paroxetine·HCl                | L20 | 0.998 | 0.093 | 1.016 | 0.151 |
| cFDA800_2 | 425 | Bendroflumethiazide           | E6  | 0.998 | 0.035 | 0.956 | 0.141 |
| cFDA800_2 | 469 | Cidofovir                     | I13 | 0.998 | 0.063 | 0.979 | 0.062 |
| cFDA800_2 | 475 | Clavulanate Potassium         | J5  | 0.998 | 0.024 | 1.143 | 0.235 |
| cFDA800_3 | 646 | Mexiletine·HCl                | C7  | 0.998 | 0.051 | 1.085 | 0.205 |
| cFDA800_3 | 84  | Lamotrigine                   | K10 | 0.999 | 0.036 | 1.016 | 0.212 |
| cFDA800_1 | 119 | Verapamil·HCl                 | D20 | 0.999 | 0.043 | 0.925 | 0.06  |
| cFDA800_1 | 123 | Trifluoperazine·HCl           | E8  | 0.999 | 0.047 | 0.944 | 0.035 |
| cFDA800_1 | 130 | Ketoconazole                  | E22 | 0.999 | 0.051 | 0.926 | 0.035 |
| cFDA800_1 | 145 | Moxifloxacin·HCl              | G12 | 0.999 | 0.046 | 0.961 | 0.096 |
| cFDA800_1 | 147 | Ketoprofen                    | G16 | 0.999 | 0.016 | 1.017 | 0.06  |
| cFDA800_3 | 385 | Acamprosate                   | M6  | 0.999 | 0.034 | 1.036 | 0.241 |
| cFDA800_3 | 700 | Pimecrolimus                  | H15 | 0.999 | 0.024 | 1.054 | 0.115 |
| cFDA800_3 | 716 | Pyrazinamide                  | B8  | 0.999 | 0.093 | 1.104 | 0.142 |
| cFDA800_3 | 766 | Blank                         | G8  | 0.999 | 0.071 | 1.03  | 0.231 |
| cFDA800_3 | 772 | Tolterodine Tartrate          | G20 | 0.999 | 0.046 | 0.974 | 0.149 |
| cFDA800_3 | 3   | Cyclosporine A                | K7  | 1     | 0.039 | 1.06  | 0.124 |
| cFDA800_1 | 140 | Neomycin Sulfate              | F22 | 1     | 0.058 | 0.951 | 0.088 |
| cFDA800_2 | 462 | Chlorhexidine Dihydrochloride | H20 | 1     | 0.051 | 1.009 | 0.068 |
| cFDA800_3 | 757 | Tenofovir                     | F10 | 1     | 0.061 | 1.039 | 0.103 |
| cFDA800_3 | 761 | Tetrabenazine                 | F18 | 1     | 0.042 | 1.071 | 0.126 |
| cFDA800_1 | 30  | Caffeine                      | C21 | 1.001 | 0.007 | 1     | 0.051 |
| cFDA800_1 | 96  | Entacapone                    | B14 | 1.001 | 0.056 | 1.101 | 0.008 |
| cFDA800_3 | 234 | Chloramphenicol               | L9  | 1.001 | 0.072 | 1.033 | 0.186 |
| cFDA800_1 | 275 | Fluconazole                   | L12 | 1.001 | 0.061 | 0.955 | 0.055 |
| cFDA800_2 | 416 | Azacitidine                   | D8  | 1.001 | 0.038 | 0.814 | 0.126 |
| cFDA800_2 | 439 | Capreomycin Sulfate           | F14 | 1.001 | 0.038 | 1.016 | 0.037 |
| cFDA800_3 | 641 | Methyl Aminolevulinate·HCl    | B17 | 1.001 | 0.022 | 1.062 | 0.184 |
| cFDA800_3 | 726 | Reserpine                     | C8  | 1.001 | 0.034 | 1.074 | 0.268 |
| cFDA800_1 | 33  | Pindolol                      | D7  | 1.002 | 0.042 | 0.878 | 0.022 |

|           |     |                                         |     |       |       |       |       |
|-----------|-----|-----------------------------------------|-----|-------|-------|-------|-------|
| cFDA800_3 | 315 | Oxcarbazepine                           | L12 | 1.002 | 0.028 | 0.979 | 0.156 |
| cFDA800_3 | 731 | Rizatriptan Benzoate                    | C18 | 1.002 | 0.017 | 0.992 | 0.14  |
| cFDA800_3 | 737 | Selegiline·HCl                          | D10 | 1.002 | 0.05  | 1.027 | 0.133 |
| cFDA800_3 | 762 | Tetrahydrozoline·HCl                    | F20 | 1.002 | 0.046 | 1.055 | 0.138 |
| cFDA800_1 | 12  | Loperamide·HCl                          | B5  | 1.003 | 0.03  | 1.097 | 0.074 |
| cFDA800_1 | 51  | Aminophylline                           | F3  | 1.003 | 0.042 | 1.004 | 0.091 |
| cFDA800_1 | 93  | Dorzolamide·HCl                         | B8  | 1.003 | 0.056 | 1.053 | 0.116 |
| cFDA800_2 | 374 | Tamoxifen Citrate                       | F9  | 1.003 | 0.021 | 0.942 | 0.031 |
| cFDA800_2 | 552 | Fexofenadine·HCl                        | I20 | 1.003 | 0.025 | 0.939 | 0.149 |
| cFDA800_3 | 90  | Aripiprazole                            | K22 | 1.004 | 0.013 | 1.052 | 0.15  |
| cFDA800_1 | 138 | Ibuprofen                               | F18 | 1.004 | 0.025 | 1.02  | 0.076 |
| cFDA800_2 | 484 | Colistin Sulfate                        | K3  | 1.004 | 0.024 | 0.981 | 0.114 |
| cFDA800_3 | 721 | Raltegravir                             | B18 | 1.004 | 0.067 | 1.074 | 0.076 |
| cFDA800_3 | 752 | Telbivudine                             | E20 | 1.004 | 0.057 | 1.013 | 0.182 |
| cFDA800_1 | 121 | Felodipine                              | E4  | 1.005 | 0.019 | 0.944 | 0.049 |
| cFDA800_1 | 203 | Pramipexole Dihydrochloride Monohydrate | M7  | 1.005 | 0.103 | 0.94  | 0.057 |
| cFDA800_3 | 312 | Nystatin                                | L6  | 1.005 | 0.009 | 1.047 | 0.162 |
| cFDA800_2 | 334 | Nelfinavir Mesylate                     | B9  | 1.005 | 0.035 | 0.998 | 0.018 |
| cFDA800_2 | 358 | Bupivacaine·HCl                         | D17 | 1.005 | 0.048 | 0.932 | 0.081 |
| cFDA800_3 | 636 | Methotrexate                            | B7  | 1.005 | 0.096 | 1.059 | 0.166 |
| cFDA800_3 | 652 | Milnacipran·HCl                         | C19 | 1.005 | 0.09  | 1.083 | 0.153 |
| cFDA800_3 | 697 | Phenelzine Sulfate                      | H9  | 1.005 | 0.057 | 1.008 | 0.238 |
| cFDA800_1 | 38  | Ipratropium·Br                          | D17 | 1.006 | 0.025 | 0.932 | 0.075 |
| cFDA800_1 | 161 | Lapatinib Ditosylate                    | I3  | 1.006 | 0.017 | 0.992 | 0.044 |
| cFDA800_1 | 224 | Vinblastine Sulfate                     | O9  | 1.006 | 0.085 | 0.867 | 0.026 |
| cFDA800_1 | 284 | Idoxuridine                             | M10 | 1.006 | 0.04  | 0.975 | 0.046 |
| cFDA800_2 | 379 | Fulvestrant                             | F19 | 1.006 | 0.046 | 0.93  | 0.059 |
| cFDA800_2 | 414 | Atomoxetine·HCl                         | D4  | 1.006 | 0.056 | 0.936 | 0.097 |
| cFDA800_2 | 556 | Fludarabine Phosphate                   | J8  | 1.006 | 0.009 | 1.014 | 0.021 |
| cFDA800_3 | 661 | Naftifine·HCl                           | D17 | 1.006 | 0.09  | 1.01  | 0.176 |
| cFDA800_3 | 2   | Felbamate                               | K5  | 1.007 | 0.066 | 0.91  | 0.196 |
| cFDA800_1 | 152 | Goserelin Acetate                       | H6  | 1.007 | 0.022 | 1.014 | 0.122 |
| cFDA800_2 | 488 | Cycloserine                             | K11 | 1.007 | 0.057 | 0.972 | 0.067 |
| cFDA800_2 | 549 | Everolimus                              | I14 | 1.007 | 0.032 | 0.966 | 0.022 |
| cFDA800_3 | 735 | Rufinamide                              | D6  | 1.007 | 0.112 | 0.976 | 0.164 |
| cFDA800_1 | 24  | Prazosin·HCl                            | C9  | 1.008 | 0.057 | 1.032 | 0.029 |
| cFDA800_1 | 72  | Isoniazid                               | H5  | 1.008 | 0.046 | 1.028 | 0.057 |
| cFDA800_1 | 149 | Terbinafine·HCl                         | G20 | 1.008 | 0.06  | 0.946 | 0.064 |
| cFDA800_1 | 198 | Lomustine                               | L17 | 1.008 | 0.01  | 0.953 | 0.08  |
| cFDA800_3 | 316 | Oxiconazole Nitrate                     | L14 | 1.008 | 0.026 | 1.119 | 0.111 |

|           |     |                                     |     |       |       |       |       |
|-----------|-----|-------------------------------------|-----|-------|-------|-------|-------|
| cFDA800_2 | 343 | Telmisartan                         | C7  | 1.008 | 0.06  | 1.006 | 0.04  |
| cFDA800_2 | 449 | Cefixime                            | G14 | 1.008 | 0.058 | 0.915 | 0.105 |
| cFDA800_3 | 618 | Mechlorethamine·HCl                 | N12 | 1.008 | 0.027 | 1.022 | 0.132 |
| cFDA800_3 | 717 | Pyridostigmine Bromide              | B10 | 1.008 | 0.068 | 0.652 | 0.541 |
| cFDA800_2 | 575 | Halobetasol Propionate              | L6  | 1.009 | 0.032 | 0.976 | 0.044 |
| cFDA800_3 | 759 | Terconazole                         | F14 | 1.009 | 0.041 | 0.984 | 0.064 |
| cFDA800_1 | 92  | Butenafine·HCl                      | B6  | 1.01  | 0.011 | 1.066 | 0.048 |
| cFDA800_1 | 157 | Delavirdine Mesylate                | H16 | 1.01  | 0.045 | 0.983 | 0.031 |
| cFDA800_2 | 518 | Digoxin                             | N11 | 1.01  | 0.039 | 0.914 | 0.104 |
| cFDA800_3 | 623 | Mepivacaine·HCl                     | N22 | 1.01  | 0.059 | 1.035 | 0.235 |
| cFDA800_3 | 667 | Nevirapine                          | E9  | 1.01  | 0.041 | 1.105 | 0.234 |
| cFDA800_1 | 23  | Amantadine·HCl                      | C7  | 1.011 | 0.03  | 1.009 | 0.08  |
| cFDA800_1 | 42  | Haloperidol                         | E5  | 1.011 | 0.041 | 0.995 | 0.026 |
| cFDA800_1 | 43  | Cimetidine                          | E7  | 1.011 | 0.048 | 0.997 | 0.089 |
| cFDA800_3 | 82  | Olanzapine                          | K6  | 1.011 | 0.025 | 1.032 | 0.104 |
| cFDA800_3 | 87  | Atovaquone                          | K16 | 1.011 | 0.021 | 0.914 | 0.074 |
| cFDA800_1 | 164 | Ergotamine Tartrate                 | I9  | 1.011 | 0.007 | 1.033 | 0.03  |
| cFDA800_2 | 380 | Esmolol                             | F21 | 1.011 | 0.045 | 0.927 | 0.035 |
| cFDA800_2 | 426 | Benztropine Mesylate                | E8  | 1.011 | 0.075 | 0.968 | 0.049 |
| cFDA800_3 | 543 | Ethinyl Estradiol                   | N21 | 1.011 | 0.037 | 0.603 | 0.52  |
| cFDA800_1 | 62  | Ranitidine·HCl                      | G5  | 1.012 | 0.042 | 0.998 | 0.07  |
| cFDA800_1 | 252 | Dextromethorphan                    | J6  | 1.012 | 0.029 | 1.048 | 0.142 |
| cFDA800_2 | 558 | Flunisolide                         | J12 | 1.012 | 0.035 | 1.021 | 0.08  |
| cFDA800_3 | 649 | Blank                               | C13 | 1.012 | 0.05  | 1.03  | 0.12  |
| cFDA800_3 | 793 | Vancomycin·HCl                      | I21 | 1.012 | 0.039 | 1.035 | 0.108 |
| cFDA800_1 | 46  | Naltrexone·HCl                      | E13 | 1.013 | 0.016 | 0.987 | 0.019 |
| cFDA800_1 | 223 | Atracurium Besylate                 | O7  | 1.013 | 0.064 | 0.927 | 0.004 |
| cFDA800_2 | 361 | Fluoxetine·HCl                      | E3  | 1.013 | 0.048 | 0.901 | 0.046 |
| cFDA800_2 | 364 | Thioridazine·HCl                    | E9  | 1.013 | 0.025 | 0.946 | 0.071 |
| cFDA800_2 | 550 | Ezetimibe                           | I16 | 1.013 | 0.025 | 0.992 | 0.059 |
| cFDA800_2 | 564 | Fluvoxamine Maleate                 | K4  | 1.013 | 0.012 | 0.979 | 0.004 |
| cFDA800_1 | 55  | Atropine Sulfate Monohydrate        | F11 | 1.014 | 0.017 | 0.965 | 0.133 |
| cFDA800_1 | 132 | Capsaicin                           | F6  | 1.014 | 0.034 | 0.931 | 0.059 |
| cFDA800_1 | 134 | Dipyridamole                        | F10 | 1.014 | 0.033 | 0.941 | 0.051 |
| cFDA800_1 | 179 | Letrozole                           | J19 | 1.014 | 0.048 | 0.907 | 0.043 |
| cFDA800_1 | 197 | Imipenem                            | L15 | 1.014 | 0.064 | 0.919 | 0.034 |
| cFDA800_1 | 254 | Zalcitabine (2',3'-Dideoxycytidine) | J10 | 1.014 | 0.022 | 0.91  | 0.117 |
| cFDA800_1 | 257 | Doxazosin Mesylate                  | J16 | 1.014 | 0.048 | 0.929 | 0.035 |
| cFDA800_2 | 382 | Succinylcholine Chloride·2H2O       | G5  | 1.014 | 0.066 | 0.943 | 0.03  |
| cFDA800_2 | 471 | Cinacalcet·HCl                      | I17 | 1.014 | 0.058 | 1.006 | 0.089 |

|           |     |                                                          |     |       |       |       |       |
|-----------|-----|----------------------------------------------------------|-----|-------|-------|-------|-------|
| cFDA800_3 | 542 | Blank                                                    | N19 | 1.014 | 0.036 | 0.998 | 0.126 |
| cFDA800_3 | 669 | Nicotine                                                 | E13 | 1.014 | 0.081 | 1.054 | 0.269 |
| cFDA800_1 | 269 | Fluorouracil (5-Fluorouracil)                            | K20 | 1.015 | 0.063 | 0.982 | 0.037 |
| cFDA800_2 | 451 | Cefoxitin·Na                                             | G18 | 1.015 | 0.016 | 1.011 | 0.135 |
| cFDA800_2 | 476 | Clobazam                                                 | J7  | 1.015 | 0.004 | 0.944 | 0.058 |
| cFDA800_3 | 537 | Erythromycin                                             | N9  | 1.015 | 0.106 | 0.996 | 0.026 |
| cFDA800_2 | 563 | Fluticasone Propionate                                   | J22 | 1.015 | 0.017 | 1.031 | 0.045 |
| cFDA800_2 | 568 | Fosfomycin Calcium                                       | K12 | 1.015 | 0.01  | 0.903 | 0.03  |
| cFDA800_3 | 714 | Propylthiouracil                                         | B4  | 1.015 | 0.052 | 1.064 | 0.082 |
| cFDA800_1 | 57  | Chlorpromazine·HCl                                       | F15 | 1.016 | 0.041 | 0.9   | 0.042 |
| cFDA800_1 | 148 | Meloxicam                                                | G18 | 1.016 | 0.011 | 1.042 | 0.017 |
| cFDA800_2 | 431 | Bisoprolol Fumarate                                      | E18 | 1.016 | 0.022 | 0.953 | 0.023 |
| cFDA800_2 | 565 | Fomepizole                                               | K6  | 1.016 | 0.012 | 0.994 | 0.047 |
| cFDA800_1 | 49  | Riluzole·HCl                                             | E19 | 1.017 | 0.029 | 0.951 | 0.124 |
| cFDA800_1 | 56  | Apomorphine·HCl Hemihydrate                              | F13 | 1.017 | 0.164 | 0.928 | 0.061 |
| cFDA800_1 | 174 | Tolazamide                                               | J9  | 1.017 | 0.046 | 1.149 | 0.053 |
| cFDA800_2 | 487 | Cyclopentolate                                           | K9  | 1.017 | 0.056 | 1.006 | 0.09  |
| cFDA800_3 | 654 | Mitotane                                                 | D3  | 1.017 | 0.019 | 1.075 | 0.063 |
| cFDA800_3 | 4   | Donepezil·HCl                                            | K9  | 1.018 | 0.035 | 0.914 | 0.094 |
| cFDA800_1 | 105 | Montelukast·Na                                           | C12 | 1.018 | 0.053 | 0.955 | 0.127 |
| cFDA800_1 | 166 | Valproic Acid                                            | I13 | 1.018 | 0.019 | 0.974 | 0.047 |
| cFDA800_1 | 221 | Ampicillin Trihydrate                                    | O3  | 1.018 | 0.095 | 1.029 | 0.06  |
| cFDA800_3 | 388 | Acetaminophen                                            | M12 | 1.018 | 0.083 | 1.036 | 0.223 |
| cFDA800_2 | 394 | Adefovir Dipivoxil                                       | B4  | 1.018 | 0.065 | 1.064 | 0.054 |
| cFDA800_2 | 446 | Cefazolin·Na                                             | G8  | 1.018 | 0.046 | 0.94  | 0.088 |
| cFDA800_2 | 553 | Fingolimod                                               | I22 | 1.018 | 0.07  | 0.94  | 0.05  |
| cFDA800_3 | 638 | Methscopolamine Bromide ((-)-Scopolamine Methyl Bromide) | B11 | 1.018 | 0.067 | 1.105 | 0.094 |
| cFDA800_1 | 78  | Olopatadine                                              | H17 | 1.019 | 0.066 | 0.958 | 0.087 |
| cFDA800_1 | 188 | Fosinopril·Na                                            | K17 | 1.019 | 0.034 | 0.896 | 0.106 |
| cFDA800_2 | 372 | Mifepristone                                             | F5  | 1.019 | 0.037 | 0.952 | 0.042 |
| cFDA800_2 | 377 | Efavirenz                                                | F15 | 1.019 | 0.049 | 0.95  | 0.166 |
| cFDA800_2 | 467 | Ciclesonide                                              | I9  | 1.019 | 0.049 | 1.02  | 0.037 |
| cFDA800_2 | 548 | Etonogestrel                                             | I12 | 1.019 | 0.019 | 0.98  | 0.08  |
| cFDA800_1 | 113 | Galantamine·HBr                                          | D8  | 1.02  | 0.067 | 1.049 | 0.082 |
| cFDA800_3 | 240 | Citalopram·HBr                                           | L21 | 1.02  | 0.038 | 1.029 | 0.222 |
| cFDA800_1 | 265 | Fenoldopam Mesylate                                      | K12 | 1.02  | 0.024 | 0.951 | 0.111 |
| cFDA800_1 | 286 | Imiquimod                                                | M14 | 1.02  | 0.053 | 0.988 | 0.042 |
| cFDA800_3 | 393 | Acrivastine                                              | M22 | 1.02  | 0.072 | 1.025 | 0.138 |
| cFDA800_2 | 508 | Dexmedetomidine·HCl                                      | M11 | 1.02  | 0.038 | 0.963 | 0.053 |
| cFDA800_3 | 630 | Metaraminol Bitartrate                                   | O15 | 1.02  | 0.028 | 1.033 | 0.051 |

|           |     |                                            |     |       |       |       |       |
|-----------|-----|--------------------------------------------|-----|-------|-------|-------|-------|
| cFDA800_3 | 723 | Rasagiline Mesylate                        | B22 | 1.02  | 0.09  | 1.116 | 0.139 |
| cFDA800_3 | 795 | Vigabatrin                                 | J5  | 1.02  | 0.042 | 1.027 | 0.104 |
| cFDA800_1 | 162 | Pioglitazone-HCl                           | I5  | 1.021 | 0.004 | 1.022 | 0.033 |
| cFDA800_1 | 172 | Glyburide                                  | J5  | 1.021 | 0.047 | 1.022 | 0.091 |
| cFDA800_3 | 327 | Prednisone                                 | M15 | 1.021 | 0.07  | 1.04  | 0.156 |
| cFDA800_2 | 373 | Megestrol Acetate                          | F7  | 1.021 | 0.054 | 1.003 | 0.066 |
| cFDA800_2 | 450 | Cefotetan Disodium                         | G16 | 1.021 | 0.013 | 0.932 | 0.125 |
| cFDA800_3 | 664 | Nebivolol-HCl                              | E3  | 1.021 | 0.026 | 1.037 | 0.191 |
| cFDA800_3 | 777 | Travoprost                                 | H10 | 1.021 | 0.025 | 1.083 | 0.112 |
| cFDA800_3 | 798 | Zaleplon                                   | J11 | 1.021 | 0.072 | 1.077 | 0.174 |
| cFDA800_1 | 115 | Amlodipine                                 | D12 | 1.022 | 0.027 | 0.934 | 0.108 |
| cFDA800_2 | 489 | Cysteamine-HCl                             | K13 | 1.022 | 0.03  | 0.942 | 0.064 |
| cFDA800_2 | 585 | Ibutilide Fumarate                         | M6  | 1.022 | 0.08  | 0.942 | 0.047 |
| cFDA800_3 | 788 | Trospium Chloride                          | I11 | 1.022 | 0.06  | 1.049 | 0.132 |
| cFDA800_1 | 50  | Propofol                                   | E21 | 1.023 | 0.036 | 0.995 | 0.05  |
| cFDA800_1 | 70  | Carbachol (Carbamylcholine ) Chloride      | G21 | 1.023 | 0.025 | 1.008 | 0.054 |
| cFDA800_1 | 73  | Ticlopidine-HCl                            | H7  | 1.023 | 0.011 | 1.013 | 0.071 |
| cFDA800_1 | 173 | Minoxidil                                  | J7  | 1.023 | 0.03  | 1.138 | 0.223 |
| cFDA800_3 | 389 | Acetazolamide                              | M14 | 1.023 | 0.037 | 0.703 | 0.58  |
| cFDA800_2 | 447 | Cefdinir                                   | G10 | 1.023 | 0.022 | 0.959 | 0.052 |
| cFDA800_2 | 591 | Isosorbide Dinitrate                       | M18 | 1.023 | 0.024 | 0.999 | 0.112 |
| cFDA800_3 | 678 | Orlistat (Tetrahydrolipstatin)             | F11 | 1.023 | 0.062 | 0.647 | 0.549 |
| cFDA800_1 | 180 | Anastrozole                                | J21 | 1.024 | 0.027 | 0.888 | 0.178 |
| cFDA800_1 | 215 | Alendronate-Na Trihydrate                  | N11 | 1.024 | 0.079 | 0.91  | 0.079 |
| cFDA800_1 | 280 | Gemfibrozil                                | L22 | 1.024 | 0.058 | 0.916 | 0.041 |
| cFDA800_2 | 424 | Bendamustine-HCl                           | E4  | 1.024 | 0.03  | 0.957 | 0.073 |
| cFDA800_2 | 512 | Diazepam                                   | M19 | 1.024 | 0.017 | 0.925 | 0.07  |
| cFDA800_3 | 629 | Metaproterenol Hemisulfate (Orciprenaline) | O13 | 1.024 | 0.066 | 0.991 | 0.167 |
| cFDA800_3 | 670 | Nilotinib                                  | E15 | 1.024 | 0.077 | 0.836 | 0.248 |
| cFDA800_1 | 259 | Enalapril                                  | J20 | 1.025 | 0.037 | 0.934 | 0.113 |
| cFDA800_3 | 325 | Progesterone                               | M11 | 1.025 | 0.029 | 0.989 | 0.049 |
| cFDA800_2 | 362 | Ondansetron                                | E5  | 1.025 | 0.067 | 0.954 | 0.067 |
| cFDA800_2 | 480 | Clotrimazole                               | J15 | 1.025 | 0.045 | 0.94  | 0.085 |
| cFDA800_3 | 644 | Metirapone                                 | C3  | 1.025 | 0.038 | 1.047 | 0.042 |
| cFDA800_1 | 29  | Betaxolol-HCl                              | C19 | 1.026 | 0.051 | 0.942 | 0.037 |
| cFDA800_1 | 58  | Fluphenazine-HCl                           | F17 | 1.026 | 0.016 | 0.946 | 0.168 |
| cFDA800_1 | 182 | Clindamycin Palmitate-HCl                  | K5  | 1.026 | 0.045 | 0.966 | 0.083 |
| cFDA800_1 | 304 | Minocycline                                | O10 | 1.026 | 0.047 | 0.985 | 0.057 |
| cFDA800_1 | 144 | Piroxicam                                  | G10 | 1.027 | 0.028 | 0.96  | 0.064 |
| cFDA800_2 | 433 | Bromfenac                                  | E22 | 1.027 | 0.021 | 0.931 | 0.051 |



|           |     |                                                             |     |       |       |       |       |
|-----------|-----|-------------------------------------------------------------|-----|-------|-------|-------|-------|
| cFDA800_2 | 466 | Chlorzoxazone                                               | I7  | 1.027 | 0.048 | 0.992 | 0.101 |
| cFDA800_2 | 561 | Flurandrenolide                                             | J18 | 1.027 | 0.035 | 0.948 | 0.074 |
| cFDA800_3 | 666 | Nepafenac                                                   | E7  | 1.027 | 0.06  | 1.006 | 0.092 |
| cFDA800_3 | 8   | Spectinomycin·HCl Pentahydrate                              | K17 | 1.028 | 0.026 | 1.104 | 0.285 |
| cFDA800_2 | 432 | Brimonidine                                                 | E20 | 1.028 | 0.053 | 0.903 | 0.038 |
| cFDA800_3 | 785 | Trimethadione                                               | I5  | 1.028 | 0.031 | 0.959 | 0.27  |
| cFDA800_1 | 271 | Amitriptyline·HCl                                           | L4  | 1.029 | 0.063 | 0.995 | 0.045 |
| cFDA800_3 | 391 | Acetohydroxamic Acid                                        | M18 | 1.029 | 0.028 | 1.033 | 0.05  |
| cFDA800_1 | 122 | Phenoxybenzamine·HCl                                        | E6  | 1.03  | 0.01  | 0.982 | 0.109 |
| cFDA800_1 | 289 | Levonorgestrel                                              | M20 | 1.03  | 0.048 | 0.979 | 0.063 |
| cFDA800_3 | 317 | Oxacillin·Na                                                | L16 | 1.03  | 0.044 | 1.115 | 0.211 |
| cFDA800_2 | 456 | Ceftriaxone·Na                                              | H8  | 1.03  | 0.023 | 1.001 | 0.037 |
| cFDA800_2 | 500 | Deferoxamine Mesylate                                       | L15 | 1.03  | 0.069 | 0.938 | 0.074 |
| cFDA800_1 | 201 | Oseltamivir Phosphate                                       | M3  | 1.031 | 0.04  | 1.017 | 0.089 |
| cFDA800_1 | 226 | Aztreonam                                                   | O13 | 1.031 | 0.088 | 1.006 | 0.048 |
| cFDA800_1 | 229 | Buspirone·HCl                                               | O19 | 1.031 | 0.081 | 0.907 | 0.055 |
| cFDA800_1 | 247 | Cyclophosphamide (Free Base)                                | I16 | 1.031 | 0.052 | 0.945 | 0.047 |
| cFDA800_2 | 436 | Bupropion                                                   | F8  | 1.031 | 0.08  | 0.957 | 0.027 |
| cFDA800_1 | 287 | Indapamide                                                  | M16 | 1.032 | 0.035 | 0.974 | 0.1   |
| cFDA800_2 | 464 | Chlorpropamide                                              | I3  | 1.032 | 0.017 | 1.023 | 0.032 |
| cFDA800_2 | 567 | Foscarnet·Na (Sodium Phosphonoformate Tribasic Hexahydrate) | K10 | 1.032 | 0.042 | 1.031 | 0.094 |
| cFDA800_1 | 15  | Phentolamine·HCl                                            | B11 | 1.033 | 0.04  | 1.103 | 0.133 |
| cFDA800_1 | 75  | Vardenafil                                                  | H11 | 1.033 | 0.055 | 1.012 | 0.092 |
| cFDA800_2 | 544 | Ethionamide                                                 | I4  | 1.033 | 0.003 | 1.034 | 0.124 |
| cFDA800_2 | 586 | Iloperidone                                                 | M8  | 1.033 | 0.028 | 1.049 | 0.062 |
| cFDA800_3 | 616 | Mannitol                                                    | N8  | 1.033 | 0.03  | 1.087 | 0.203 |
| cFDA800_3 | 722 | Ramelteon                                                   | B20 | 1.033 | 0.048 | 1.155 | 0.179 |
| cFDA800_3 | 799 | Zanamivir                                                   | J13 | 1.033 | 0.049 | 0.981 | 0.028 |
| cFDA800_1 | 266 | Fenoprofen Calcium                                          | K14 | 1.034 | 0.099 | 0.958 | 0.024 |
| cFDA800_1 | 277 | Ganciclovir                                                 | L16 | 1.034 | 0.064 | 0.932 | 0.054 |
| cFDA800_3 | 328 | Primaquine Phosphate                                        | M17 | 1.034 | 0.011 | 1.02  | 0.116 |
| cFDA800_3 | 658 | Mupirocin                                                   | D11 | 1.034 | 0.09  | 1.068 | 0.19  |
| cFDA800_1 | 211 | Acyclovir (Acycloguanosine) Zovirax                         | N3  | 1.035 | 0.087 | 1.025 | 0.038 |
| cFDA800_3 | 235 | Chlorambucil                                                | L11 | 1.035 | 0.077 | 0.936 | 0.131 |
| cFDA800_1 | 274 | Flutamide                                                   | L10 | 1.035 | 0.105 | 1.004 | 0.035 |
| cFDA800_3 | 719 | Quinidine·HCl·H2O                                           | B14 | 1.035 | 0.091 | 1.058 | 0.074 |
| cFDA800_1 | 186 | Enalaprilat Maleate                                         | K13 | 1.036 | 0.033 | 0.931 | 0.186 |
| cFDA800_1 | 187 | Fluvastatin·Na                                              | K15 | 1.036 | 0.072 | 0.795 | 0.047 |
| cFDA800_1 | 255 | Diflunisal                                                  | J12 | 1.036 | 0.071 | 1.018 | 0.035 |
| cFDA800_2 | 514 | Dicyclomine·HCl                                             | N3  | 1.036 | 0.039 | 0.922 | 0.044 |



|           |     |                                                             |     |       |       |       |       |
|-----------|-----|-------------------------------------------------------------|-----|-------|-------|-------|-------|
| cFDA800_3 | 536 | Eptifibatide                                                | N7  | 1.036 | 0.053 | 0.985 | 0.018 |
| cFDA800_3 | 237 | Chloroquine Diphosphate                                     | L15 | 1.037 | 0.063 | 1.019 | 0.122 |
| cFDA800_3 | 314 | Omeprazole                                                  | L10 | 1.037 | 0.07  | 1.108 | 0.072 |
| cFDA800_2 | 551 | Febuxostat                                                  | I18 | 1.037 | 0.006 | 0.987 | 0.1   |
| cFDA800_3 | 730 | Ritonavir                                                   | C16 | 1.037 | 0.135 | 1.006 | 0.235 |
| cFDA800_1 | 190 | Granisetron·HCl                                             | K21 | 1.038 | 0.043 | 0.907 | 0.096 |
| cFDA800_3 | 238 | Thalidomide                                                 | L17 | 1.038 | 0.058 | 1.037 | 0.11  |
| cFDA800_1 | 264 | Famciclovir                                                 | K10 | 1.038 | 0.073 | 0.993 | 0.027 |
| cFDA800_2 | 376 | Bosentan                                                    | F13 | 1.038 | 0.027 | 0.946 | 0.043 |
| cFDA800_2 | 493 | Dapsone                                                     | K21 | 1.038 | 0.04  | 1.003 | 0.068 |
| cFDA800_2 | 594 | Kanamycin Sulfate                                           | N4  | 1.038 | 0.057 | 1.02  | 0.064 |
| cFDA800_1 | 65  | Quetiapine Fumarate                                         | G11 | 1.039 | 0.03  | 0.936 | 0.06  |
| cFDA800_1 | 94  | Escitalopram                                                | B10 | 1.039 | 0.057 | 1.016 | 0.071 |
| cFDA800_2 | 482 | Colchicine                                                  | J19 | 1.039 | 0.036 | 1.03  | 0.18  |
| cFDA800_3 | 539 | Estropipate                                                 | N13 | 1.039 | 0.055 | 1.045 | 0.172 |
| cFDA800_2 | 560 | Fluorometholone                                             | J16 | 1.039 | 0.042 | 0.993 | 0.054 |
| cFDA800_3 | 668 | Niacin (Known As Vitamin B3, Nicotinic Acid And Vitamin Pp) | E11 | 1.039 | 0.06  | 0.984 | 0.057 |
| cFDA800_3 | 713 | Proparacaine·HCl                                            | O22 | 1.039 | 0.023 | 0.863 | 0.04  |
| cFDA800_1 | 185 | Dolasetron                                                  | K11 | 1.04  | 0.038 | 0.929 | 0.021 |
| cFDA800_3 | 648 | Miconazole                                                  | C11 | 1.04  | 0.108 | 0.987 | 0.125 |
| cFDA800_2 | 578 | Hydralazine·HCl                                             | L12 | 1.041 | 0.081 | 0.947 | 0.005 |
| cFDA800_2 | 605 | Levocarnitine                                               | O6  | 1.041 | 0.04  | 0.98  | 0.077 |
| cFDA800_1 | 163 | Rivastigmine Tartrate                                       | I7  | 1.042 | 0.021 | 1.095 | 0.074 |
| cFDA800_1 | 278 | Gatifloxacin                                                | L18 | 1.042 | 0.01  | 0.992 | 0.056 |
| cFDA800_1 | 308 | Naphazoline·HCl                                             | O18 | 1.042 | 0.058 | 1.044 | 0.033 |
| cFDA800_2 | 573 | Guanidine·HCl                                               | K22 | 1.042 | 0.088 | 0.975 | 0.056 |
| cFDA800_2 | 582 | Hydroxychloroquine Sulfate                                  | L20 | 1.042 | 0.016 | 0.951 | 0.048 |
| cFDA800_3 | 632 | Methacholine Chloride                                       | O19 | 1.042 | 0.048 | 0.845 | 0.312 |
| cFDA800_2 | 496 | Darunavir                                                   | L7  | 1.043 | 0.066 | 0.981 | 0.058 |
| cFDA800_3 | 619 | Meclizine Dihydrochloride                                   | N14 | 1.043 | 0.062 | 1.042 | 0.122 |
| cFDA800_1 | 281 | Glimepiride                                                 | M4  | 1.044 | 0.056 | 1.057 | 0.045 |
| cFDA800_1 | 299 | Methyldopa Sesquihydrate (L-A-Methyl-Dopa Sesquihyrate)     | N20 | 1.044 | 0.055 | 0.967 | 0.065 |
| cFDA800_1 | 196 | Ibandronate·Na Monohydrate                                  | L13 | 1.045 | 0.014 | 0.984 | 0.053 |
| cFDA800_3 | 236 | Chlorpheniramine Maleate                                    | L13 | 1.045 | 0.114 | 0.991 | 0.159 |
| cFDA800_1 | 253 | Diclofenac·Na Salt                                          | J8  | 1.045 | 0.027 | 0.977 | 0.154 |
| cFDA800_2 | 465 | Chlorthalidone                                              | I5  | 1.045 | 0.042 | 1.072 | 0.018 |
| cFDA800_2 | 547 | Etomidate                                                   | I10 | 1.045 | 0.038 | 0.86  | 0.057 |
| cFDA800_1 | 195 | Cabergoline                                                 | L11 | 1.046 | 0.052 | 1.04  | 0.041 |
| cFDA800_3 | 386 | Acarbose                                                    | M8  | 1.046 | 0.04  | 0.908 | 0.142 |
| cFDA800_3 | 781 | Triamterene                                                 | H18 | 1.046 | 0.071 | 0.917 | 0.297 |

|           |     |                                   |     |       |       |       |       |
|-----------|-----|-----------------------------------|-----|-------|-------|-------|-------|
| cFDA800_1 | 296 | Medroxyprogesterone Acetate       | N14 | 1.047 | 0.041 | 0.922 | 0.057 |
| cFDA800_2 | 474 | Cladribine                        | J3  | 1.047 | 0.048 | 1.058 | 0.164 |
| cFDA800_2 | 477 | Clofazimine                       | J9  | 1.047 | 0.014 | 1.026 | 0.109 |
| cFDA800_2 | 587 | Indinavir                         | M10 | 1.047 | 0.062 | 1.029 | 0.096 |
| cFDA800_3 | 647 | Micafungin                        | C9  | 1.047 | 0.079 | 1.053 | 0.26  |
| cFDA800_2 | 499 | Deferasirox                       | L13 | 1.048 | 0.095 | 1.005 | 0.065 |
| cFDA800_3 | 747 | Sulfanilamide                     | E10 | 1.048 | 0.09  | 0.978 | 0.076 |
| cFDA800_3 | 750 | Tadalafil                         | E16 | 1.048 | 0.2   | 0.873 | 0.104 |
| cFDA800_3 | 10  | Nicardipine·HCl                   | K21 | 1.049 | 0.055 | 1.071 | 0.193 |
| cFDA800_1 | 217 | Sumatriptan Succinate             | N15 | 1.049 | 0.047 | 0.937 | 0.084 |
| cFDA800_3 | 329 | Praziquantel                      | M19 | 1.049 | 0.03  | 1.047 | 0.157 |
| cFDA800_2 | 513 | Dicloxacillin·Na Salt Monohydrate | M21 | 1.049 | 0.044 | 0.936 | 0.015 |
| cFDA800_2 | 572 | Griseofulvin                      | K20 | 1.049 | 0.045 | 0.866 | 0.039 |
| cFDA800_3 | 701 | Pitavastatin Calcium              | H17 | 1.049 | 0.082 | 0.836 | 0.267 |
| cFDA800_1 | 146 | Carbidopa                         | G14 | 1.05  | 0.038 | 1.006 | 0.093 |
| cFDA800_1 | 204 | Triptorelin Acetate               | M9  | 1.05  | 0.03  | 0.916 | 0.019 |
| cFDA800_3 | 756 | Teniposide                        | F8  | 1.05  | 0.048 | 0.989 | 0.231 |
| cFDA800_3 | 318 | Pantoprazole                      | L18 | 1.051 | 0.059 | 1.04  | 0.188 |
| cFDA800_2 | 555 | Flucytosine                       | J6  | 1.051 | 0.052 | 0.949 | 0.024 |
| cFDA800_1 | 262 | Estrone                           | K6  | 1.052 | 0.049 | 1.015 | 0.024 |
| cFDA800_2 | 427 | Betaine                           | E10 | 1.052 | 0.05  | 0.939 | 0.091 |
| cFDA800_2 | 460 | Chenodiol (Chenodeoxycholic Acid) | H16 | 1.052 | 0.059 | 1.032 | 0.104 |
| cFDA800_2 | 517 | Difluprednate                     | N9  | 1.052 | 0.056 | 1.016 | 0.06  |
| cFDA800_2 | 520 | Disopyramide                      | N15 | 1.052 | 0.003 | 0.917 | 0.047 |
| cFDA800_1 | 100 | Carvedilol                        | B22 | 1.053 | 0.066 | 1.062 | 0.098 |
| cFDA800_1 | 210 | Aspirin (Acetylsalicylic Acid)    | M21 | 1.053 | 0.009 | 1.011 | 0.091 |
| cFDA800_1 | 219 | 4-Aminosalicylic Acid             | N19 | 1.053 | 0.116 | 0.961 | 0.055 |
| cFDA800_2 | 491 | Dalfampridine (4-Aminopyridine)   | K17 | 1.053 | 0.032 | 0.968 | 0.052 |
| cFDA800_2 | 528 | Dutasteride                       | O11 | 1.053 | 0.008 | 1     | 0.026 |
| cFDA800_2 | 569 | Fosphenytoin·Na Pentahydrate      | K14 | 1.053 | 0.018 | 1.009 | 0.043 |
| cFDA800_2 | 607 | Levothyroxine·Na                  | O10 | 1.053 | 0.06  | 1.008 | 0.086 |
| cFDA800_3 | 706 | Prasugrel                         | O8  | 1.053 | 0.037 | 1.06  | 0.109 |
| cFDA800_1 | 206 | Rocuronium Bromide                | M13 | 1.054 | 0.057 | 0.971 | 0.085 |
| cFDA800_1 | 302 | Methimazole                       | O6  | 1.054 | 0.042 | 1.044 | 0.085 |
| cFDA800_2 | 546 | Etodolac                          | I8  | 1.054 | 0.031 | 0.979 | 0.054 |
| cFDA800_1 | 270 | Flurbiprofen                      | K22 | 1.055 | 0.007 | 0.905 | 0.085 |
| cFDA800_3 | 330 | Quinapril·HCl                     | M21 | 1.055 | 0.03  | 1.115 | 0.148 |
| cFDA800_2 | 355 | Valacyclovir·HCl                  | D11 | 1.055 | 0.064 | 0.846 | 0.06  |
| cFDA800_2 | 554 | Flavoxate·HCl                     | J4  | 1.055 | 0.042 | 1.017 | 0.072 |
| cFDA800_1 | 272 | Floxuridine                       | L6  | 1.056 | 0.071 | 0.988 | 0.047 |

|           |     |                                    |     |       |       |       |       |
|-----------|-----|------------------------------------|-----|-------|-------|-------|-------|
| cFDA800_2 | 479 | Clonazepam                         | J13 | 1.056 | 0.015 | 0.949 | 0.078 |
| cFDA800_2 | 557 | Fludrocortisone Acetate            | J10 | 1.056 | 0.026 | 0.949 | 0.046 |
| cFDA800_2 | 562 | Blank                              | J20 | 1.056 | 0.075 | 1.057 | 0.078 |
| cFDA800_2 | 600 | Lansoprazole                       | N16 | 1.056 | 0.053 | 0.963 | 0.055 |
| cFDA800_2 | 580 | Hydroflumethiazide                 | L16 | 1.057 | 0.015 | 0.984 | 0.134 |
| cFDA800_2 | 584 | Hydroxyzine Dihydrochloride        | M4  | 1.057 | 0.051 | 1.011 | 0.038 |
| cFDA800_3 | 685 | Palonosetron·HCl                   | G5  | 1.057 | 0.021 | 0.865 | 0.114 |
| cFDA800_1 | 126 | Bromocriptine Mesylate             | E14 | 1.058 | 0.036 | 0.945 | 0.023 |
| cFDA800_1 | 192 | Atazanavir                         | L5  | 1.058 | 0.07  | 0.969 | 0.069 |
| cFDA800_2 | 335 | Rimantadine·HCl                    | B11 | 1.058 | 0.042 | 1.02  | 0.066 |
| cFDA800_2 | 470 | Cilostazol                         | I15 | 1.058 | 0.009 | 1.055 | 0.012 |
| cFDA800_2 | 583 | Hydroxyurea                        | L22 | 1.058 | 0.051 | 0.925 | 0.062 |
| cFDA800_3 | 712 | Blank                              | O20 | 1.058 | 0.098 | 1.006 | 0.075 |
| cFDA800_1 | 303 | Metronidazole                      | O8  | 1.059 | 0.043 | 1.019 | 0.07  |
| cFDA800_2 | 452 | Cefpodoxime Proxetil               | G20 | 1.059 | 0.087 | 0.933 | 0.083 |
| cFDA800_2 | 502 | Desipramine·HCl                    | L19 | 1.061 | 0.047 | 0.956 | 0.059 |
| cFDA800_3 | 534 | Epirubicin·HCl                     | N3  | 1.061 | 0.077 | 1.02  | 0.246 |
| cFDA800_2 | 603 | Levalbuterol·HCl                   | N22 | 1.061 | 0.056 | 0.958 | 0.113 |
| cFDA800_1 | 54  | Acetylcholine Chloride             | F9  | 1.062 | 0.044 | 0.996 | 0.076 |
| cFDA800_1 | 292 | Lisinopril·2H2O                    | N6  | 1.063 | 0.108 | 0.959 | 0.058 |
| cFDA800_2 | 468 | Ciclopirox                         | I11 | 1.063 | 0.016 | 0.919 | 0.073 |
| cFDA800_1 | 297 | Mefenamic Acid                     | N16 | 1.064 | 0.114 | 0.925 | 0.078 |
| cFDA800_3 | 392 | Acetylcysteine                     | M20 | 1.064 | 0.06  | 1.05  | 0.107 |
| cFDA800_2 | 574 | Halcinonide                        | L4  | 1.064 | 0.029 | 0.919 | 0.165 |
| cFDA800_2 | 611 | Lorazepam                          | O18 | 1.064 | 0.079 | 0.972 | 0.067 |
| cFDA800_2 | 613 | Loxapine Succinate                 | O22 | 1.064 | 0.042 | 1.03  | 0.082 |
| cFDA800_2 | 478 | Clomipramine·HCl                   | J11 | 1.065 | 0.046 | 1.13  | 0.13  |
| cFDA800_2 | 495 | Darifenacin·HBr                    | L5  | 1.065 | 0.044 | 0.97  | 0.122 |
| cFDA800_3 | 232 | Cefotaxime Acid                    | L5  | 1.066 | 0.181 | 1.027 | 0.133 |
| cFDA800_2 | 596 | Labetalol·HCl                      | N8  | 1.066 | 0.039 | 0.919 | 0.075 |
| cFDA800_3 | 624 | Meprobamate (Schedule IV)          | O3  | 1.066 | 0.047 | 1.065 | 0.101 |
| cFDA800_3 | 89  | Cefepime·HCl Hydrate               | K20 | 1.067 | 0.024 | 1.026 | 0.174 |
| cFDA800_1 | 220 | Mesalamine (5-Aminosalicylic Acid) | N21 | 1.067 | 0.049 | 0.934 | 0.043 |
| cFDA800_3 | 239 | Ciprofloxacin                      | L19 | 1.067 | 0.015 | 0.964 | 0.036 |
| cFDA800_1 | 294 | Losartan Potassium                 | N10 | 1.067 | 0.142 | 1.007 | 0.12  |
| cFDA800_2 | 498 | Decitabine                         | L11 | 1.067 | 0.065 | 1.008 | 0.028 |
| cFDA800_2 | 533 | Epinastine·HCl                     | O21 | 1.067 | 0.055 | 0.923 | 0.128 |
| cFDA800_1 | 263 | Etidronate Disodium                | K8  | 1.068 | 0.012 | 1.042 | 0.074 |
| cFDA800_1 | 279 | Gentamycin Sulfate                 | L20 | 1.068 | 0.053 | 0.967 | 0.071 |
| cFDA800_2 | 485 | Cortisone Acetate                  | K5  | 1.068 | 0.084 | 1.017 | 0.032 |

|           |     |                                     |     |       |       |       |       |
|-----------|-----|-------------------------------------|-----|-------|-------|-------|-------|
| cFDA800_2 | 522 | Doripenem                           | N19 | 1.068 | 0.052 | 1.008 | 0.074 |
| cFDA800_3 | 541 | Ethambutol Dihydrochloride          | N17 | 1.068 | 0.024 | 0.967 | 0.153 |
| cFDA800_1 | 200 | Meropenem                           | L21 | 1.071 | 0.106 | 0.92  | 0.033 |
| cFDA800_1 | 306 | Paclitaxel (Taxol)                  | O14 | 1.071 | 0.054 | 0.982 | 0.036 |
| cFDA800_3 | 313 | Ofloxacin                           | L8  | 1.071 | 0.101 | 1     | 0.112 |
| cFDA800_3 | 707 | Pravastatin·Na                      | O10 | 1.071 | 0.07  | 0.671 | 0.55  |
| cFDA800_3 | 390 | Acetohexamide                       | M16 | 1.072 | 0.029 | 1.144 | 0.213 |
| cFDA800_2 | 521 | Dopamine·HCl                        | N17 | 1.072 | 0.04  | 0.932 | 0.092 |
| cFDA800_1 | 295 | Mebendazole                         | N12 | 1.073 | 0.09  | 0.926 | 0.012 |
| cFDA800_1 | 309 | Nefazodone·HCl                      | O20 | 1.073 | 0.087 | 1.085 | 0.085 |
| cFDA800_2 | 592 | Isotretinoin (13-Cis-Retinoic Acid) | M20 | 1.073 | 0.046 | 0.925 | 0.058 |
| cFDA800_2 | 599 | Lamivudine                          | N14 | 1.073 | 0.041 | 0.951 | 0.042 |
| cFDA800_3 | 620 | Meclofenamate·Na                    | N16 | 1.073 | 0.02  | 0.872 | 0.32  |
| cFDA800_3 | 621 | Mefloquine·HCl                      | N18 | 1.073 | 0.022 | 1.062 | 0.113 |
| cFDA800_3 | 705 | Pralidoxime Chloride                | O6  | 1.073 | 0.054 | 1.061 | 0.173 |
| cFDA800_1 | 205 | Risredonic Acid                     | M11 | 1.074 | 0.065 | 0.924 | 0.016 |
| cFDA800_2 | 497 | Dasatinib                           | L9  | 1.074 | 0.029 | 0.928 | 0.04  |
| cFDA800_3 | 708 | Pregabalin                          | O12 | 1.074 | 0.029 | 0.797 | 0.396 |
| cFDA800_2 | 609 | Liothyronine·Na                     | O14 | 1.075 | 0.081 | 0.924 | 0.076 |
| cFDA800_1 | 285 | Ifosfamide                          | M12 | 1.076 | 0.045 | 1.005 | 0.063 |
| cFDA800_2 | 527 | Duloxetine·HCl                      | O9  | 1.076 | 0.102 | 0.962 | 0.078 |
| cFDA800_3 | 538 | Estramustine Phosphate·Na           | N11 | 1.076 | 0.028 | 1.023 | 0.123 |
| cFDA800_3 | 736 | Saquinavir Mesylate                 | D8  | 1.076 | 0.062 | 1.138 | 0.166 |
| cFDA800_1 | 103 | Imatinib Mesylate                   | C8  | 1.077 | 0.114 | 0.96  | 0.072 |
| cFDA800_2 | 612 | Loteprednol Etabonate               | O20 | 1.077 | 0.106 | 1.018 | 0.134 |
| cFDA800_1 | 214 | Altretamine                         | N9  | 1.078 | 0.086 | 0.93  | 0.03  |
| cFDA800_2 | 524 | Doxepin·HCl                         | O3  | 1.078 | 0.056 | 1.001 | 0.048 |
| cFDA800_3 | 617 | Maraviroc                           | N10 | 1.078 | 0.057 | 1.015 | 0.135 |
| cFDA800_3 | 711 | Probenecid                          | O18 | 1.078 | 0.051 | 0.952 | 0.264 |
| cFDA800_1 | 276 | Furosemide                          | L14 | 1.079 | 0.062 | 0.954 | 0.039 |
| cFDA800_2 | 506 | Desvenlafaxine Succinate Hydrate    | M7  | 1.079 | 0.044 | 0.954 | 0.061 |
| cFDA800_3 | 323 | Piperacillin                        | M7  | 1.08  | 0.072 | 0.983 | 0.185 |
| cFDA800_2 | 589 | Irinotecan·HCl                      | M14 | 1.08  | 0.05  | 0.876 | 0.044 |
| cFDA800_2 | 597 | Lacosamide                          | N10 | 1.08  | 0.038 | 0.95  | 0.075 |
| cFDA800_3 | 710 | Primidone                           | O16 | 1.08  | 0.01  | 0.777 | 0.429 |
| cFDA800_1 | 298 | Melphalan                           | N18 | 1.081 | 0.082 | 0.924 | 0.066 |
| cFDA800_2 | 590 | Isocarboxazid                       | M16 | 1.081 | 0.026 | 1.04  | 0.048 |
| cFDA800_3 | 326 | Procarbazine·HCl                    | M13 | 1.082 | 0.025 | 1.063 | 0.074 |
| cFDA800_2 | 503 | Desogestrel                         | L21 | 1.083 | 0.045 | 0.877 | 0.069 |
| cFDA800_1 | 290 | Levofloxacin·HCl                    | M22 | 1.084 | 0.047 | 0.987 | 0.031 |

|           |     |                                                     |     |       |       |       |       |
|-----------|-----|-----------------------------------------------------|-----|-------|-------|-------|-------|
| cFDA800_1 | 213 | Allopurinol                                         | N7  | 1.085 | 0.021 | 0.925 | 0.051 |
| cFDA800_2 | 570 | Gemifloxacin                                        | K16 | 1.085 | 0.056 | 0.945 | 0.123 |
| cFDA800_2 | 602 | Leucovorin Calcium Pentahydrate                     | N20 | 1.085 | 0.047 | 1.041 | 0.023 |
| cFDA800_1 | 136 | Indomethacin                                        | F14 | 1.086 | 0.093 | 0.903 | 0.071 |
| cFDA800_1 | 222 | (±)-Atenolol                                        | O5  | 1.086 | 0.107 | 0.937 | 0.078 |
| cFDA800_2 | 523 | Doxapram·HCl                                        | N21 | 1.086 | 0.031 | 0.966 | 0.056 |
| cFDA800_2 | 593 | Isradipine                                          | M22 | 1.086 | 0.088 | 0.974 | 0.058 |
| cFDA800_2 | 579 | Hydrochlorothiazide                                 | L14 | 1.087 | 0.106 | 0.99  | 0.017 |
| cFDA800_3 | 628 | Mestranol                                           | O11 | 1.087 | 0.076 | 1.099 | 0.091 |
| cFDA800_2 | 417 | Azelaic Acid                                        | D10 | 1.088 | 0.014 | 0.943 | 0.101 |
| cFDA800_2 | 494 | Daptomycin                                          | L3  | 1.088 | 0.028 | 1.084 | 0.03  |
| cFDA800_2 | 504 | Desonide                                            | M3  | 1.088 | 0.037 | 0.985 | 0.079 |
| cFDA800_2 | 531 | Blank                                               | O17 | 1.088 | 0.064 | 1.008 | 0.106 |
| cFDA800_1 | 202 | Pamidronate Disodium Pentahydrate (Pamidronic Acid) | M5  | 1.089 | 0.055 | 0.913 | 0.032 |
| cFDA800_3 | 626 | Mercaptopurine Hydrate                              | O7  | 1.089 | 0.038 | 0.846 | 0.21  |
| cFDA800_2 | 516 | Blank                                               | N7  | 1.092 | 0.039 | 0.88  | 0.052 |
| cFDA800_2 | 507 | Dexchlorpheniramine Maleate                         | M9  | 1.093 | 0.048 | 0.971 | 0.07  |
| cFDA800_2 | 604 | Levobunolol·HCl                                     | O4  | 1.093 | 0.058 | 1.048 | 0.015 |
| cFDA800_2 | 610 | Lopinavir                                           | O16 | 1.093 | 0.091 | 1.044 | 0.073 |
| cFDA800_3 | 633 | Methazolamide                                       | O21 | 1.093 | 0.058 | 1.034 | 0.104 |
| cFDA800_1 | 310 | Norethindrone                                       | O22 | 1.094 | 0.057 | 0.973 | 0.04  |
| cFDA800_3 | 631 | Metaxalone                                          | O17 | 1.094 | 0.017 | 1.105 | 0.247 |
| cFDA800_2 | 519 | Dimenhydrinate                                      | N13 | 1.095 | 0.014 | 1.028 | 0.12  |
| cFDA800_1 | 301 | Metoprolol Tartrate                                 | O4  | 1.096 | 0.114 | 0.931 | 0.04  |
| cFDA800_2 | 601 | Lenalidomide                                        | N18 | 1.097 | 0.034 | 0.885 | 0.154 |
| cFDA800_1 | 225 | Azithromycin                                        | O11 | 1.1   | 0.098 | 0.931 | 0.028 |
| cFDA800_2 | 509 | Blank                                               | M13 | 1.1   | 0.053 | 0.971 | 0.041 |
| cFDA800_2 | 510 | Dexrazoxane                                         | M15 | 1.1   | 0.05  | 0.959 | 0.03  |
| cFDA800_2 | 515 | Dienogest                                           | N5  | 1.1   | 0.047 | 0.982 | 0.121 |
| cFDA800_3 | 627 | Mesna                                               | O9  | 1.1   | 0.064 | 0.882 | 0.064 |
| cFDA800_2 | 532 | Eflornithine·HCl                                    | O19 | 1.102 | 0.106 | 0.901 | 0.06  |
| cFDA800_1 | 230 | Carboplatin                                         | O21 | 1.104 | 0.059 | 0.934 | 0.007 |
| cFDA800_2 | 606 | Levocetirizine Dihydrochloride                      | O8  | 1.104 | 0.088 | 0.952 | 0.069 |
| cFDA800_3 | 622 | Mepenzolate Bromide                                 | N20 | 1.104 | 0.073 | 1.061 | 0.07  |
| cFDA800_2 | 529 | Dyphylline                                          | O13 | 1.105 | 0.042 | 0.997 | 0.082 |
| cFDA800_1 | 293 | Loratadine                                          | N8  | 1.106 | 0.053 | 0.99  | 0.023 |
| cFDA800_1 | 216 | Albendazole                                         | N13 | 1.107 | 0.096 | 0.916 | 0.074 |
| cFDA800_2 | 588 | Irbesartan                                          | M12 | 1.107 | 0.018 | 0.957 | 0.077 |
| cFDA800_1 | 191 | Oxaliplatin                                         | L3  | 1.108 | 0.071 | 1.013 | 0.033 |
| cFDA800_2 | 526 | Drospirenone                                        | O7  | 1.109 | 0.052 | 1.014 | 0.083 |

|           |     |                                         |     |       |       |       |       |
|-----------|-----|-----------------------------------------|-----|-------|-------|-------|-------|
| cFDA800_1 | 212 | Zidovudine (3'-Azido-3'-Deoxythymidine) | N5  | 1.11  | 0.119 | 0.966 | 0.069 |
| cFDA800_2 | 608 | Lindane                                 | O12 | 1.11  | 0.082 | 0.985 | 0.114 |
| cFDA800_1 | 288 | Itraconazole                            | M18 | 1.113 | 0.086 | 0.956 | 0.055 |
| cFDA800_1 | 307 | Nabumetone                              | O16 | 1.121 | 0.078 | 1.048 | 0.063 |
| cFDA800_2 | 598 | Lactulose                               | N12 | 1.121 | 0.047 | 0.93  | 0.092 |
| cFDA800_1 | 291 | Leflunomide                             | N4  | 1.126 | 0.074 | 1.08  | 0.062 |
| cFDA800_3 | 709 | Prilocaine·HCl                          | O14 | 1.126 | 0.058 | 1.061 | 0.049 |
| cFDA800_3 | 704 | Posaconazole                            | O4  | 1.178 | 0.133 | 1.018 | 0.118 |
| cFDA800_2 | 430 | Biperiden·HCl                           | E16 | 1.43  | 0.071 | 0.317 | 0.032 |
| cFDA800_1 | 159 | Doxorubicin·HCl                         | H20 | 2.675 | 0.496 | 0.735 | 0.105 |
| cFDA800_1 | 158 | Daunorubicin·HCl                        | H18 | 3.832 | 0.249 | 0.599 | 0.009 |
